# Supplementary material for: Localisation and origin of the bacteriochlorophyll-derived photosensitizer in the retina of the deep-sea dragon fish Malacosteus niger
Source: PubMed Central journal article supplement (PMC5171636; doi:10.1038/srep39395), 2016-12-20
Supplement: srep39395-s1.pdf [file srep39395-s1.pdf]

## Supplementary material

# Localisation and origin of the bacteriochlorophyll-derived photosensitizer in the retina of the deep-sea dragon fish

## *Malacosteus niger*

Ronald H Douglas, Martin J Genner, Alan G Hudson, Julian C Partridge  
and Hans-Joachim Wagner

- Supplementary File S1 & Figure S1** Translation of extracts from Brauer (1908) with associated figures
- Supplementary Figure S2** Elemental spectroscopy (TEM EELS) imaging of the *Malacosteus niger* RPE
- Supplementary Figure S3** SYTOX green staining of the *Malacosteus niger* retina
- Supplementary Figure S4** *In vivo* and *in vitro* absorption spectra of chlorophyll-derived retinal photosensitizer in *Malacosteus niger*
- Supplementary Figure S5** Fluorescence emission spectra from different regions of the retina of the *Scopelarchus analis* retina
- Supplementary Table S1** Retina genes significantly up-regulated in *Malacosteus* relative to *Pachystomias*
- Supplementary Table S2** Retina isoforms significantly up-regulated in *Malacosteus* relative to *Pachystomias*
- Supplementary Table S3** Gene ontology terms significantly enriched in genes up-regulated in *Malacosteus* relative to *Pachystomias*
- Supplementary Table S4** Taxonomic identity and diversity of assigned reads following normalization of transcript number from the *Malacosteus* and *Pachystomias* retina metatranscriptomes
- Supplementary Table S5** Identity of transcripts of putatively bacterial origin from *Malacosteus* and *Pachystomias* retinae overlapping in gene ontology (GO) term annotation with GO terms directly associated with the search term 'Bacteriochlorophyll' (S% = 100) and those recorded as being co-annotated with these search terms in previous studies (S% < 100)

## Supplementary File S1. Translation of extracts from Brauer (1908)

Because the original publication is in German and is hard to obtain, but was central to initiating the current study, we include a partial translation here.

Extract from p177, 3 lines from the bottom of the page, to p178 line 19.  
“However, the most interesting thing about the *Malacosteus* eye is the following. Between the rods and the pigment cells there is a very strange layer (Fig 14-16, ta; [see Supplementary Fig S1]). It consists of yellowish structures. They have a quite irregular shape. They are most strongly developed in the region of the optic nerve head (op) where they are sometimes very large. Going sideways from here (i.e. peripherally) they decrease in size. Nasally they decrease in size rapidly and soon disappear completely. In contrast temporally they persist until almost the base of the iris. They are completely homogenous, anucleate, and appear like a solidified secretion. Initially I assumed they were artefacts but had to give up that notion. Firstly it is completely unclear to me where these structures could have come from as the preparation was treated with sublimat (a fixative). If their formation was due to preservation one would have found them in other locations too. Furthermore, their strikingly regular layering speaks against this. In the region of the optic nerve head it was not so obvious, however, further away, where they are not so thick, each structure has the same width as a pigment cell. As one can see especially well under higher magnification by comparing drawings from bleached (Fig 16a) and unbleached (Fig 16b) sections, in some cases the relationship is so intimate that there can be little doubt that the structures are derived from the pigmented cells. The formation of the large irregular structures is possibly due to the fusion or tight agglomeration of smaller structures due to the shrinkage of the eye (during fixation). It must also be pointed out that in the live animal the fundus shines purple. There must therefore be a tapetum in the eye. However, such a structure is missing in the usual location and couldn't function as it would be blocked by the retinal pigment. It is therefore very likely that the aforementioned structures represent the tapetum.”

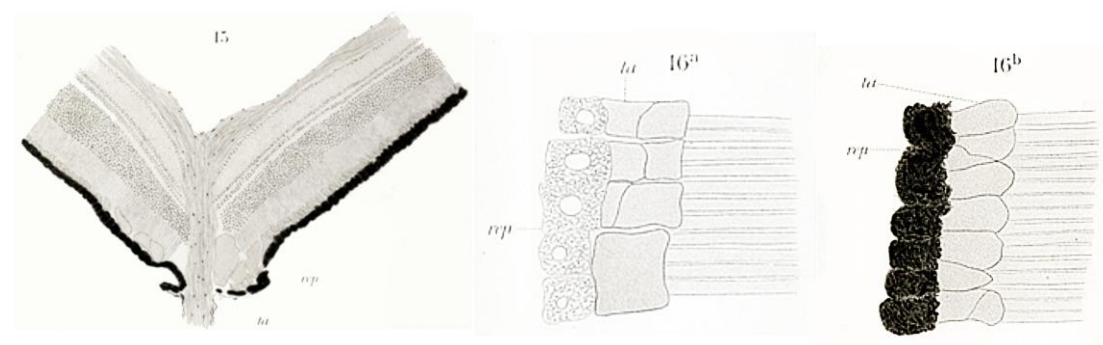

### Supplementary Figure S1. plate XXXIII from Brauer (1908)

15 – Eye of *Malacosteus indicus* magnified x135. 16 – Bleached (a) and unbleached sections of the same eye at x810 magnification. rep – retinal pigment epithelium; ta – tapetum. In 16a&b the elongated structures on the right represent rod outer segments.

Brauer, A. (1908) Die Tiefsee-Fische. 2. Anatomische Teil. *Wiss. Ergebn. dt. Tiefsee-Exped. Valdivia* 15, 1-266.

## Supplementary Figure S2.

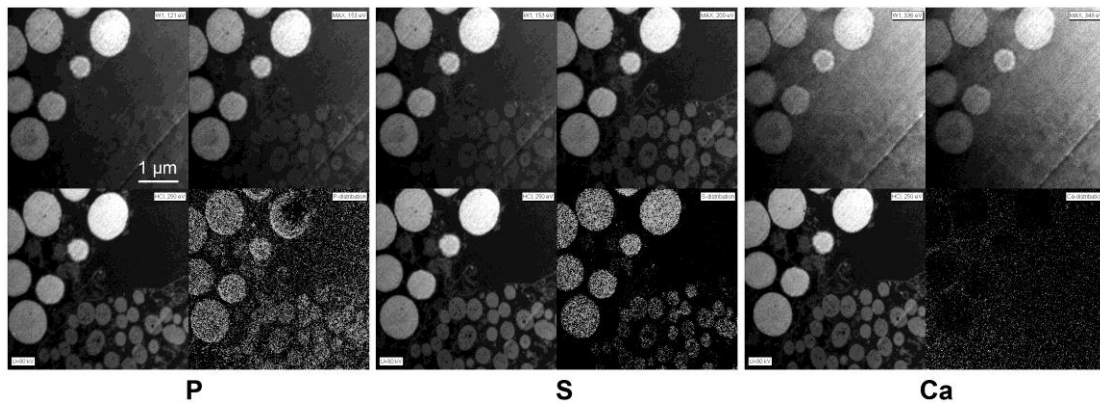

### Elemental spectroscopy (TEM EELS) imaging of the *Malacosteus niger* RPE

The large spheres represent melanin granules in the scleral retinal pigment epithelium, while the smaller spheres make up the vitreally located tapetal spheres. The upper left panel of each grid represents the baseline signal, while the upper right panel contains the element-specific emissions signals for phosphorous, sulphur and calcium (P 153eV; S 200eV; Ca 348eV). The lower right panel shows the difference between the previous two images and thus gives the net distribution of the element. The lower left panel is a dark-field image. Melanosomes show clear presence of both P and S, whereas these elements are only slightly above background in the tapetal spheres. No Ca signal was detected in either of the structures.

**Supplementary Figure S3.**

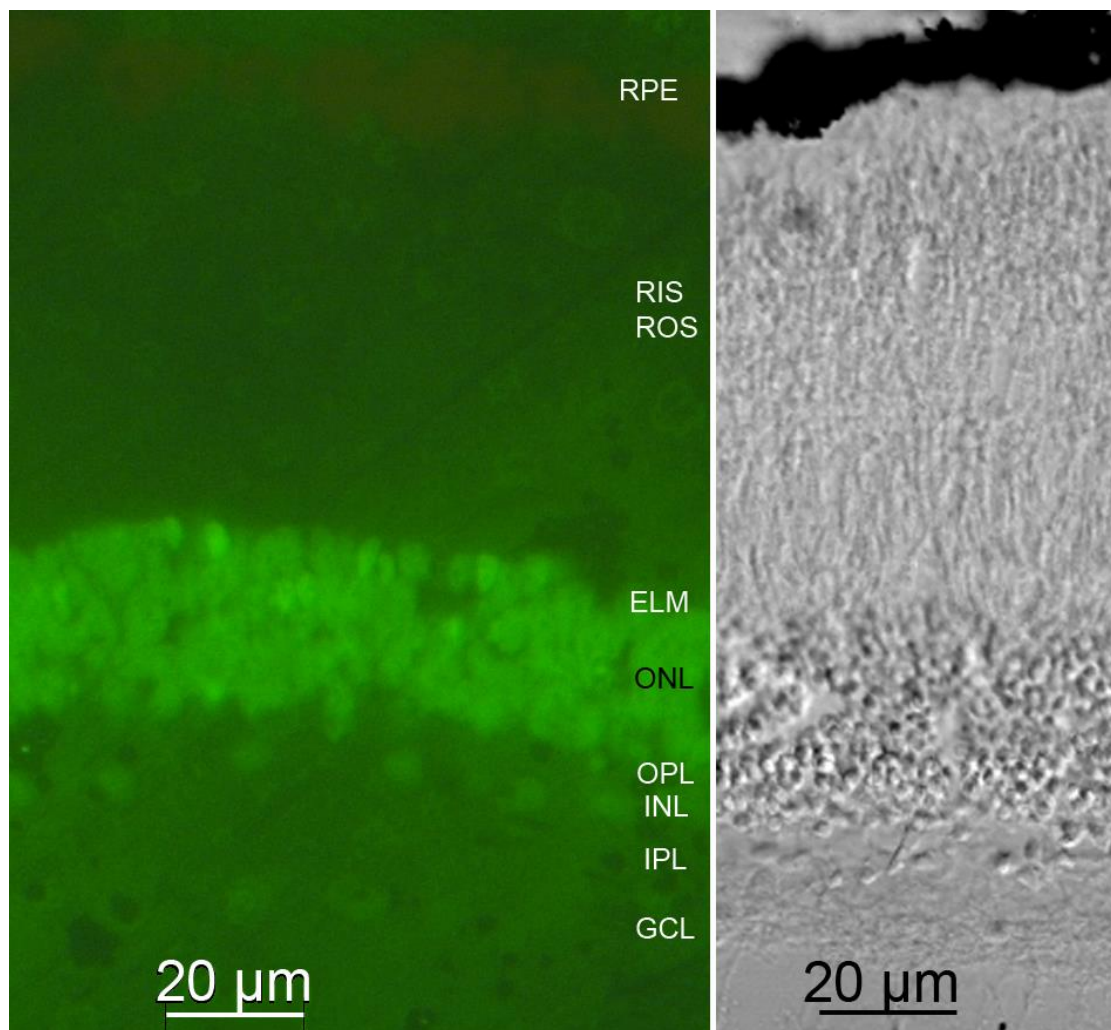

**SYTOX green staining of the *Malacosteus niger* retina (left).** Only the nuclear layers (ONL, INL and GCL) are stained, with little fluorescence elsewhere in the retina. The right hand image shows a DIC image of a similar unstained section to show more clearly the retinal layers. Labelling as in Figure 1.

#### Supplementary Figure S4.

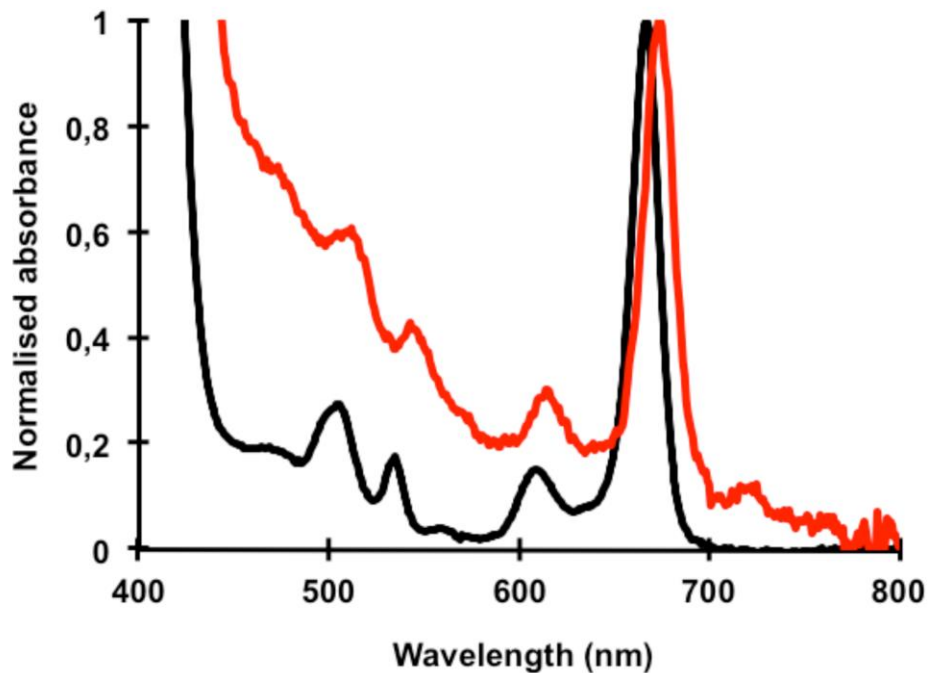

#### ***In vivo* and *in vitro* absorption spectra of chlorophyll-derived retinal photosensitizer in *Malacosteus niger***

Average absorbance spectrum of the mid and inner RIS/ROS layers from unstained cryosections of *Malacosteus niger* retinae shown in Fig 3 (red) compared to that of the purified diethyl ether extract of a *Malacosteus niger* retinal suspension (black) identified as containing a mixture of defarnesylated and demetallated derivatives of bacteriochlorophylls c and d (Douglas et al., 1999). The two scans, which are very similar, have been normalised to their longwave absorbance peak. The gradual rise in the spectrum recorded here at short wavelengths in the cryosection spectra is due to the encroaching absorption of the red tapetal pigment.

Douglas, R.H., Partridge, J.C., Dulai, K.S., Hunt, D.M., Mullineaux, C.W. & Hynninen, P.H. Enhanced retina longwave sensitivity using a chlorophyll-derived photosensitiser in *Malacosteus niger*, a deep-sea dragon fish with far red bioluminescence. *Vision Res.* **39**, 2817-2832 (1999) .

## Supplementary Figure S5.

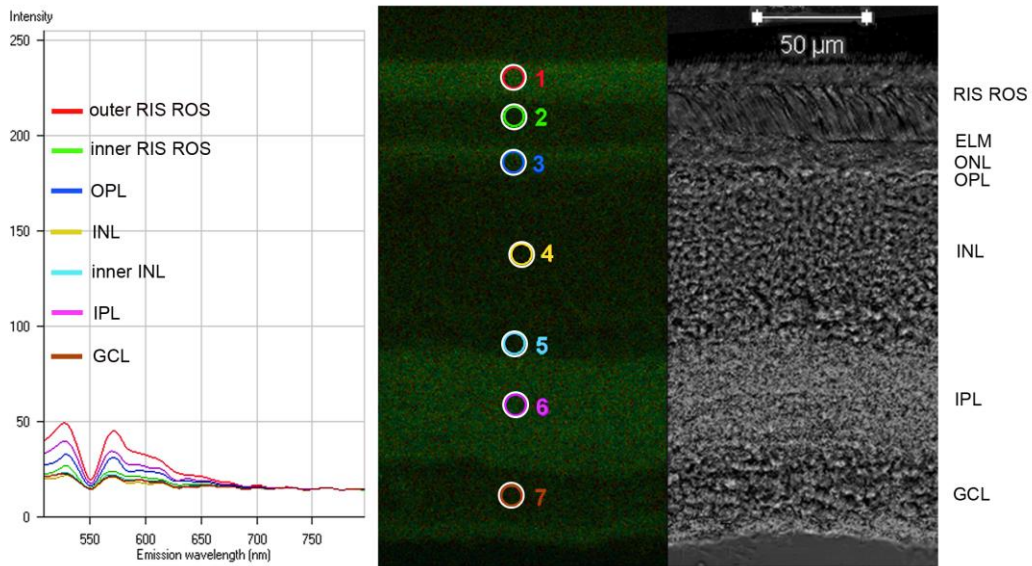

### Fluorescence emission spectra from different regions of the *Scopelarchus analis* retina

Fluorescence emission spectra from different regions of a transverse cryosection of the *Scopelarchus analis* retina (left panel), a fluorescence image (middle panel) resulting from excitation at 488 nm, with locations (circles) from which emission spectra were recorded, and a DIC image of the same field of view. This figure is comparable with Figure 5 for *Malacosteus niger*. While the *M. niger* retina showed emission spectra typical of a chlorophyll-like compound, in *S. analis* the only fluorescence is some weak shortwave background autofluorescence and there is no sign of a chlorophyll-like signal.

**Supplementary Table S1. Retina genes significantly up-regulated in *Malacosteus* relative to *Pachystomias*. For each gene, annotation with respect to the most similar protein sequence hit from BLASTx searches (Protein Identity) and the organism from which this sequence derived (Taxon) are given. For differential expression analyses, the multi-test corrected significance level (FDR) and normalized expression values per individual (PM1, MN1, MN2) for each gene are also given.**

| Gene ID               | Protein Identity                                                            | Taxon                                   | FDR         | PM1   | MN1       | MN2       |
|-----------------------|-----------------------------------------------------------------------------|-----------------------------------------|-------------|-------|-----------|-----------|
| TRINITY_DN60692_c0_g1 | Cytochrome c oxidase subunit 1                                              | Metazoa; Actinopterygii; Salmonidae     | 0.000110399 | 0.061 | 658.729   | 842.65    |
| TRINITY_DN65229_c0_g1 | Guanine nucleotide-binding protein G(t) subunit alpha-1                     | Metazoa; Mammalia; Muridae              | 0.000110399 | 0     | 579.494   | 976.686   |
| TRINITY_DN50791_c0_g1 | Rhodopsin                                                                   | Metazoa; Actinopterygii; Stomiidae      | 0.000113825 | 1.397 | 7960.377  | 8874.18   |
| TRINITY_DN62339_c0_g2 | <i>No Match</i>                                                             | <i>No Match</i>                         | 0.000172702 | 4.375 | 35655.406 | 60259.183 |
| TRINITY_DN38768_c0_g3 | Retinal rod rhodopsin-sensitive cGMP 3',5'-cyclic phosphodiesterase subunit | Metazoa; Mammalia; Bovidae              | 0.000192765 | 0     | 1210.65   | 2447.329  |
| TRINITY_DN44906_c0_g1 | Guanine nucleotide-binding protein subunit gamma                            | Metazoa; Actinopterygii; Gasterosteidae | 0.000202662 | 0     | 1180.021  | 2069.196  |
| TRINITY_DN34250_c0_g1 | NADH-ubiquinone oxidoreductase chain 5                                      | Metazoa; Actinopterygii; Retropinnidae  | 0.000244866 | 0     | 329.225   | 321.198   |
| TRINITY_DN62973_c1_g2 | <i>No Match</i>                                                             | <i>No Match</i>                         | 0.000287407 | 0     | 1679.693  | 1392.302  |
| TRINITY_DN39938_c0_g2 | <i>No Match</i>                                                             | <i>No Match</i>                         | 0.000481751 | 2.843 | 13909.843 | 4909.795  |
| TRINITY_DN48042_c0_g1 | Cytochrome c oxidase subunit 3                                              | Metazoa; Actinopterygii; Stomiidae      | 0.000532077 | 0.196 | 628.072   | 692.039   |
| TRINITY_DN69731_c6_g1 | Interphotoreceptor matrix proteoglycan 2                                    | Metazoa; Aves; Phasianinae              | 0.000534892 | 0     | 72.615    | 146.169   |
| TRINITY_DN69457_c2_g1 | Riboflavin-binding protein                                                  | Metazoa; Actinopterygii; Salmonidae     | 0.000656198 | 0     | 321.865   | 395.404   |
| TRINITY_DN38768_c0_g2 | <i>No Match</i>                                                             | <i>No Match</i>                         | 0.00071397  | 0     | 1096.637  | 2041.104  |
| TRINITY_DN69921_c3_g2 | Rod cGMP-specific 3',5'-cyclic phosphodiesterase subunit alpha              | Metazoa; Actinopterygii; Ictaluridae    | 0.000824181 | 0     | 202.764   | 265.114   |
| TRINITY_DN70830_c3_g2 | ATP-binding cassette sub-family A member 1                                  | Metazoa; Mammalia; Muridae              | 0.000916848 | 0     | 153.031   | 125.957   |
| TRINITY_DN45697_c1_g1 | Peripherin-2                                                                | Metazoa; Aves; Phasianidae              | 0.001384829 | 0     | 270.806   | 466.878   |



|                        |                                                           |                                                   |             |       |          |         |
|------------------------|-----------------------------------------------------------|---------------------------------------------------|-------------|-------|----------|---------|
| TRINITY_DN70278_c1_g27 | Interphotoreceptor matrix proteoglycan 1                  | Metazoa; Aves; Phasianidae                        | 0.001488788 | 0     | 80.651   | 92.997  |
| TRINITY_DN57337_c0_g1  | Peripherin-2                                              | Metazoa; Mammalia; Canidae                        | 0.001488788 | 0     | 169.104  | 315.598 |
| TRINITY_DN57898_c0_g1  | <i>No Match</i>                                           | <i>No Match</i>                                   | 0.002494108 | 1.973 | 3041.345 | 4471.66 |
| TRINITY_DN7106_c0_g1   | <i>No Match</i>                                           | <i>No Match</i>                                   | 0.002634897 | 0     | 83.276   | 174.333 |
| TRINITY_DN69026_c5_g1  | Retinol dehydrogenase 3                                   | Metazoa; Mammalia; Muridae                        | 0.004317284 | 0     | 99.384   | 132.498 |
| TRINITY_DN54320_c0_g1  | Creatine kinase, mitochondrial 2                          | Metazoa; Actinopterygii; Salmonidae               | 0.004497442 | 0     | 196.397  | 102.434 |
| TRINITY_DN65214_c0_g1  | <i>No Match</i>                                           | <i>No Match</i>                                   | 0.004998362 | 0     | 3367.197 | 91.369  |
| TRINITY_DN64536_c0_g2  | <i>No Match</i>                                           | <i>No Match</i>                                   | 0.004998362 | 0     | 183.138  | 359.414 |
| TRINITY_DN59359_c0_g1  | Type-4 ice-structuring protein LS-12                      | Metazoa; Actinopterygii; Cottidae                 | 0.005259391 | 0     | 319.357  | 283.199 |
| TRINITY_DN70660_c2_g1  | Prominin-1-A                                              | Metazoa; Actinopterygii; Cyprinidae               | 0.006326684 | 0.11  | 47.325   | 118.61  |
| TRINITY_DN70565_c0_g2  | S-arrestin                                                | Metazoa; Mammalia; Bovidae                        | 0.007089057 | 0     | 168.265  | 50.023  |
| TRINITY_DN53485_c0_g1  | NADH-ubiquinone oxidoreductase chain 4                    | Metazoa; Actinopterygii; Salangichthys            | 0.007354909 | 0     | 118.487  | 117.57  |
| TRINITY_DN65876_c0_g1  | <i>No Match</i>                                           | <i>No Match</i>                                   | 0.007354909 | 0     | 115.484  | 83.751  |
| TRINITY_DN58067_c0_g2  | Gamma-crystallin M3                                       | Metazoa; Actinopterygii; Cyprinidae               | 0.007513501 | 0     | 1290.084 | 2.796   |
| TRINITY_DN70513_c4_g17 | <i>No Match</i>                                           | <i>No Match</i>                                   | 0.007513501 | 0     | 651.288  | 688.646 |
| TRINITY_DN64954_c0_g1  | <i>No Match</i>                                           | <i>No Match</i>                                   | 0.007513501 | 0     | 320.873  | 325.876 |
| TRINITY_DN71259_c1_g1  | Pol polyprotein                                           | Viruses; Retro-transcribing viruses; Retroviridae | 0.008163544 | 0     | 0.83     | 39.7    |
| TRINITY_DN63039_c0_g1  | Uncharacterized protein                                   | Metazoa; Actinopterygii; Characidae               | 0.008443126 | 0     | 86.811   | 171.429 |
| TRINITY_DN70717_c0_g1  | Si:dkey-52k20.12 protein                                  | Metazoa; Actinopterygii; Cyprinidae               | 0.0086058   | 0     | 37.015   | 241.88  |
| TRINITY_DN106325_c0_g1 | <i>No Match</i>                                           | <i>No Match</i>                                   | 0.0086058   | 0     | 2314.773 | 3.456   |
| TRINITY_DN67162_c3_g1  | Voltage-dependent L-type calcium channel subunit alpha-1F | Metazoa; Mammalia; Hominidae                      | 0.0086058   | 0     | 20.474   | 37.709  |
| TRINITY_DN69281_c1_g1  | Guanylate cyclase                                         | Metazoa; Actinopterygii; Lepisosteidae            | 0.0086058   | 0     | 58.328   | 45.807  |
| TRINITY_DN70736_c3_g2  | Voltage-dependent calcium channel subunit alpha-2/delta-4 | Metazoa; Mammalia; Muridae                        | 0.008687966 | 0     | 60.935   | 81.01   |
| TRINITY_DN67846_c10_g4 | Uncharacterized protein                                   | Metazoa; Actinopterygii; Cyprinidae               | 0.008687966 | 0     | 110.325  | 156.727 |
| TRINITY_DN67613_c0_g1  | Uncharacterized protein                                   | Metazoa; Actinopterygii; Gasterosteidae           | 0.008687966 | 0     | 45.187   | 226.066 |



|                       |                                                         |                                           |             |       |          |         |
|-----------------------|---------------------------------------------------------|-------------------------------------------|-------------|-------|----------|---------|
| TRINITY_DN45697_c1_g2 | Peripherin-2                                            | Metazoa; Aves; Phasianinae                | 0.008687966 | 0     | 47.054   | 148.503 |
| TRINITY_DN70642_c0_g1 | Oxygen-regulated protein 1                              | Metazoa; Mammalia; Cercopithecidae        | 0.008687966 | 0     | 15.739   | 25.523  |
| TRINITY_DN67838_c0_g2 | SEC14-like protein 2                                    | Metazoa; Mammalia; Bovidae                | 0.008687966 | 0     | 36.682   | 51.461  |
| TRINITY_DN63927_c0_g1 | Retinol dehydrogenase 7                                 | Metazoa; Mammalia; Muridae                | 0.009228132 | 0     | 163.539  | 111.083 |
| TRINITY_DN71136_c1_g2 | Calcium-transporting ATPase                             | Metazoa; Actinopterygii; Gasterosteida    | 0.00928412  | 0     | 15.658   | 28.074  |
| TRINITY_DN64954_c1_g1 | <i>No Match</i>                                         | <i>No Match</i>                           | 0.00928412  | 0     | 343.583  | 313.246 |
| TRINITY_DN62400_c0_g6 | <i>No Match</i>                                         | <i>No Match</i>                           | 0.009299491 | 0     | 1562.288 | 1.502   |
| TRINITY_DN67660_c0_g1 | Signal peptidase complex subunit 3                      | Metazoa; Actinopterygii; Salmonidae       | 0.009299491 | 0     | 39.595   | 103.085 |
| TRINITY_DN70849_c3_g1 | Retinol-binding protein I, cellular                     | Metazoa; Actinopterygii; Salmonidae       | 0.009319606 | 0     | 106.609  | 98.661  |
| TRINITY_DN79162_c0_g1 | Synaptotagmin-2                                         | Metazoa; Mammalia; Muridae                | 0.00987854  | 0     | 79.479   | 117.642 |
| TRINITY_DN70825_c0_g1 | Pleckstrin homology domain-containing family A member 5 | Metazoa; Mammalia; Hominidae              | 0.010609874 | 0     | 43.302   | 41.039  |
| TRINITY_DN61263_c0_g1 | Guanylyl cyclase-activating protein                     | Metazoa; Amphibia; Ranidae                | 0.011037955 | 0     | 62.694   | 58.808  |
| TRINITY_DN3114_c0_g1  | Diamine acetyltransferase 1                             | Metazoa; Actinopterygii; Salmonidae       | 0.011037955 | 0     | 85.395   | 120.221 |
| TRINITY_DN70896_c0_g1 | Photoreceptor-specific nuclear receptor                 | Metazoa; Mammalia; Bovidae                | 0.011784287 | 0     | 48.714   | 83.163  |
| TRINITY_DN65277_c0_g1 | Homeobox protein otx5-A                                 | Metazoa; Amphibia; Pipidae                | 0.012075689 | 0.159 | 55.189   | 111.409 |
| TRINITY_DN70958_c5_g1 | Protein piccolo;                                        | Metazoa; Mammalia; Hominidae              | 0.012952422 | 0     | 5.808    | 18.891  |
| TRINITY_DN69281_c0_g1 | Retinal guanylyl cyclase 2                              | Metazoa; Mammalia; Bovidae                | 0.014367259 | 0     | 51.618   | 30.969  |
| TRINITY_DN58894_c0_g1 | Vesicle-associated membrane protein 2                   | Metazoa; Mammalia; Muridae                | 0.014367259 | 0     | 35.554   | 36.669  |
| TRINITY_DN69246_c4_g4 | Uncharacterized protein                                 | Metazoa; Actinopterygii; Adrianichthyidae | 0.016729807 | 0     | 1109.174 | 6.55    |
| TRINITY_DN66896_c0_g1 | NADH-ubiquinone oxidoreductase chain 5                  | Metazoa; Actinopterygii; Retropinnidae    | 0.016729807 | 0     | 14.35    | 24.708  |
| TRINITY_DN69097_c0_g1 | Neuronal pentraxin-1                                    | Metazoa; Mammalia; Muridae                | 0.01711466  | 0     | 20.591   | 46.141  |
| TRINITY_DN70996_c0_g6 | Uncharacterized protein                                 | Metazoa; Actinopterygii; Cichlidae        | 0.01711466  | 0     | 28.149   | 44.142  |
| TRINITY_DN70519_c4_g1 | Protein disulfide-isomerase TMX3                        | Metazoa; Mammalia; Hominidae              | 0.017169678 | 0     | 51.519   | 47.643  |
| TRINITY_DN69559_c2_g1 | <i>No Match</i>                                         | <i>No Match</i>                           | 0.017198826 | 0.27  | 66.112   | 97.286  |
| TRINITY_DN53171_c0_g1 | Protein lifeguard 2                                     | Metazoa; Mammalia; Hominidae              | 0.017226679 | 0     | 67.708   | 122.962 |
| TRINITY_DN58241_c0_g1 | <i>No Match</i>                                         | <i>No Match</i>                           | 0.017226679 | 0     | 343.277  | 216.991 |
| TRINITY_DN67290_c0_g4 | <i>No Match</i>                                         | <i>No Match</i>                           | 0.017226679 | 0     | 56.515   | 45.209  |

|                       |                                               |                                               |             |       |         |         |
|-----------------------|-----------------------------------------------|-----------------------------------------------|-------------|-------|---------|---------|
| TRINITY_DN58487_c0_g1 | Ferritin                                      | Metazoa; Actinopterygii; Salmonidae           | 0.017226679 | 0     | 45.304  | 142.821 |
| TRINITY_DN70398_c0_g6 | Cyclic nucleotide-gated cation channel beta-1 | Metazoa; Mammalia; Hominidae                  | 0.017226679 | 0     | 39.207  | 38.352  |
| TRINITY_DN68980_c1_g3 | Vesicle-fusing ATPase                         | Metazoa; Actinopterygii; Salmonidae           | 0.017226679 | 0     | 17.84   | 38.949  |
| TRINITY_DN67159_c0_g1 | Threo-3-hydroxyaspartate ammonia-lyase        | Fungi; Saccharomycetes;<br>Saccharomycetaceae | 0.017226679 | 0     | 26.364  | 39.003  |
| TRINITY_DN58067_c0_g1 | Gamma M8b crystallin                          | Metazoa; Actinopterygii; Nototheniidae;       | 0.017226679 | 0     | 663.852 | 1.294   |
| TRINITY_DN69506_c0_g2 | Tubby-related protein 1                       | Metazoa; Mammalia; Hominidae                  | 0.01734168  | 0     | 33.606  | 42.296  |
| TRINITY_DN66993_c0_g1 | Aryl-hydrocarbon-interacting protein-like 1   | Metazoa; Mammalia; Muridae                    | 0.01734168  | 0     | 71.596  | 88.41   |
| TRINITY_DN69921_c4_g1 | <i>No Match</i>                               | <i>No Match</i>                               | 0.01734168  | 0     | 43.663  | 53.443  |
| TRINITY_DN64267_c0_g1 | Homeobox protein otx5                         | Metazoa; Amphibia; Pipidae                    | 0.017408199 | 0     | 52.15   | 213.716 |
| TRINITY_DN69731_c4_g1 | <i>No Match</i>                               | <i>No Match</i>                               | 0.017582254 | 0     | 59.87   | 118.393 |
| TRINITY_DN60428_c1_g1 | <i>No Match</i>                               | <i>No Match</i>                               | 0.017582254 | 0     | 36.745  | 72.921  |
| TRINITY_DN65748_c0_g1 | <i>No Match</i>                               | <i>No Match</i>                               | 0.017997971 | 0     | 49.201  | 194.97  |
| TRINITY_DN69324_c0_g1 | Retinoid isomerohydrolase                     | Metazoa; Actinopterygii; Cyprinidae           | 0.017997971 | 0.306 | 70.558  | 125.912 |
| TRINITY_DN65962_c7_g1 | Synaptophysin                                 | Metazoa; Actinopterygii; Salmonidae           | 0.018042754 | 0     | 27.572  | 39.084  |
| TRINITY_DN69432_c3_g1 | <i>No Match</i>                               | <i>No Match</i>                               | 0.018042754 | 0     | 80.994  | 175.943 |
| TRINITY_DN70483_c4_g1 | Uncharacterized protein C2orf71               | Metazoa; Mammalia; Hominidae                  | 0.018042754 | 0     | 9.434   | 25.423  |
| TRINITY_DN69018_c0_g1 | Complexin 4a                                  | Metazoa; Actinopterygii; Cyprinidae           | 0.018973677 | 0     | 39.397  | 86.673  |
| TRINITY_DN70729_c1_g1 | Uncharacterized protein                       | Metazoa; Actinopterygii; Cichlidae            | 0.019351679 | 0     | 21.448  | 25.459  |
| TRINITY_DN71226_c0_g4 | Protocadherin-15                              | Metazoa; Mammalia; Muridae                    | 0.019351679 | 0     | 48.236  | 99.475  |
| TRINITY_DN69742_c4_g1 | <i>No Match</i>                               | <i>No Match</i>                               | 0.019351679 | 0     | 133.937 | 0.308   |
| TRINITY_DN61880_c0_g1 | Uncharacterized protein C2orf71               | Metazoa; Mammalia; Hominidae                  | 0.019727983 | 0     | 15.955  | 26.816  |
| TRINITY_DN69731_c8_g1 | <i>No Match</i>                               | <i>No Match</i>                               | 0.020557426 | 0     | 55.135  | 90.329  |
| TRINITY_DN67289_c4_g1 | cGMP-gated cation channel alpha-1             | Metazoa; Mammalia; Muridae                    | 0.020557426 | 0     | 38.459  | 36.669  |
| TRINITY_DN68860_c1_g2 | Heterogeneous nuclear ribonucleoprotein A0    | Metazoa; Actinopterygii; Salmonidae           | 0.020557426 | 0     | 36.231  | 68.805  |
| TRINITY_DN70733_c0_g3 | Phosducin                                     | Metazoa; Mammalia; Canidae                    | 0.02063239  | 0     | 42.842  | 52.502  |
| TRINITY_DN51487_c0_g1 | <i>No Match</i>                               | <i>No Match</i>                               | 0.02063239  | 0     | 166.66  | 366.706 |
| TRINITY_DN63229_c0_g1 | <i>No Match</i>                               | <i>No Match</i>                               | 0.02063239  | 0     | 133.036 | 160.825 |

|                        |                                                               |                                                   |             |       |         |          |
|------------------------|---------------------------------------------------------------|---------------------------------------------------|-------------|-------|---------|----------|
| TRINITY_DN44906_c0_g2  | Guanine nucleotide-binding protein G(T) subunit gamma-T1      | Metazoa; Mammalia; Bovidae                        | 0.02063239  | 0     | 186.006 | 0.299    |
| TRINITY_DN59372_c0_g1  | <i>No Match</i>                                               | <i>No Match</i>                                   | 0.02063239  | 0     | 454.503 | 77.87    |
| TRINITY_DN65557_c0_g2  | Cystatin                                                      | Metazoa; Actinopterygii; Osmeridae                | 0.02063239  | 0     | 30.963  | 84.792   |
| TRINITY_DN45143_c0_g1  | Elongation factor 1-alpha                                     | Metazoa; Actinopterygii; Tetraodontidae           | 0.02063239  | 0.172 | 55.686  | 61.585   |
| TRINITY_DN67491_c7_g1  | Polysialic acid O-acetyltransferase                           | Bacteria; Gammaproteobacteria; Enterobacteriaceae | 0.020836876 | 0     | 33.768  | 51.515   |
| TRINITY_DN70883_c0_g1  | Cadherin-related family member 1                              | Metazoa; Actinopterygii; Cyprinidae               | 0.02086276  | 0     | 22.35   | 46.748   |
| TRINITY_DN69654_c0_g4  | Amino acid transporter                                        | Metazoa; Actinopterygii; Tetraodontidae           | 0.022254672 | 0     | 8.686   | 18.339   |
| TRINITY_DN65277_c1_g1  | Homeobox protein otx5                                         | Metazoa; Amphibia; Pipidae                        | 0.022254672 | 1.078 | 155.223 | 335.059  |
| TRINITY_DN71055_c0_g1  | <i>No Match</i>                                               | <i>No Match</i>                                   | 0.02325171  | 0     | 3.725   | 73.953   |
| TRINITY_DN69731_c7_g1  | Interphotoreceptor matrix proteoglycan 2                      | Metazoa; Aves; Phasianidae                        | 0.023274875 | 0     | 34.851  | 34.154   |
| TRINITY_DN69986_c0_g2  | Chromosome 12 SCAF14999                                       | Metazoa; Actinopterygii; Tetraodontidae           | 0.023284476 | 0     | 198.597 | 126.4    |
| TRINITY_DN64187_c0_g1  | Potassium voltage-gated channel subfamily V member 2          | Metazoa; Mammalia; Muridae                        | 0.023284476 | 0     | 23.099  | 39.555   |
| TRINITY_DN69290_c0_g1  | G-protein-coupled receptor kinase 1a                          | Metazoa; Actinopterygii; Cyprinidae               | 0.023419956 | 0.172 | 37.106  | 72.605   |
| TRINITY_DN47315_c0_g2  | <i>No Match</i>                                               | <i>No Match</i>                                   | 0.02491745  | 0     | 25.038  | 1998.437 |
| TRINITY_DN39620_c0_g1  | <i>No Match</i>                                               | <i>No Match</i>                                   | 0.025230125 | 0     | 273.241 | 183.579  |
| TRINITY_DN65272_c0_g1  | Echinoderm microtubule-associated protein-like 1              | Metazoa; Mammalia; Hominidae                      | 0.025230125 | 0     | 22.088  | 62.617   |
| TRINITY_DN70616_c1_g1  | Synembryn-A                                                   | Metazoa; Amphibia; Pipidae                        | 0.025230125 | 0     | 33.832  | 31.557   |
| TRINITY_DN70006_c1_g1  | Delta and Notch-like epidermal growth factor-related receptor | Metazoa; Mammalia; Hominidae                      | 0.026162882 | 0     | 13.511  | 29.042   |
| TRINITY_DN38168_c0_g2  | <i>No Match</i>                                               | <i>No Match</i>                                   | 0.026162882 | 0     | 486.035 | 575.238  |
| TRINITY_DN69246_c4_g14 | Uncharacterized protein                                       | Metazoa; Actinopterygii; Adrianichthyidae         | 0.02636436  | 0     | 727.565 | 42.17    |
| TRINITY_DN65558_c0_g1  | RBP3-like protein-2                                           | Metazoa; Actinopterygii; Osmeridae                | 0.02636436  | 0.907 | 234.675 | 91.306   |
| TRINITY_DN70781_c1_g2  | <i>No Match</i>                                               | <i>No Match</i>                                   | 0.02636436  | 0     | 61.882  | 95.675   |
| TRINITY_DN68675_c0_g2  | Excitatory amino acid transporter 5                           | Metazoa; Mammalia; Hominidae                      | 0.027485367 | 0     | 34.111  | 38.922   |
| TRINITY_DN33844_c0_g2  | <i>No Match</i>                                               | <i>No Match</i>                                   | 0.027927168 | 0     | 71.271  | 93.377   |

|                        |                                                                                               |                                         |             |       |          |         |
|------------------------|-----------------------------------------------------------------------------------------------|-----------------------------------------|-------------|-------|----------|---------|
| TRINITY_DN71102_c3_g4  | Photoreceptor outer segment membrane glycoprotein 2                                           | Metazoa; Aves; Phasianidae              | 0.028222186 | 0     | 37.755   | 35.04   |
| TRINITY_DN70068_c4_g1  | <i>No Match</i>                                                                               | <i>No Match</i>                         | 0.029218571 | 0     | 175.67   | 102.588 |
| TRINITY_DN46053_c0_g1  | <i>No Match</i>                                                                               | <i>No Match</i>                         | 0.029253029 | 0     | 131.683  | 264.698 |
| TRINITY_DN69920_c2_g1  | Retinal-specific ATP-binding cassette transporter                                             | Metazoa; Mammalia; Hominidae            | 0.030075402 | 0     | 12.302   | 20.782  |
| TRINITY_DN70319_c4_g11 | <i>No Match</i>                                                                               | <i>No Match</i>                         | 0.030143298 | 0.797 | 96.534   | 191.668 |
| TRINITY_DN70619_c5_g3  | <i>No Match</i>                                                                               | <i>No Match</i>                         | 0.030145736 | 0     | 420.221  | 306.894 |
| TRINITY_DN61128_c0_g2  | <i>No Match</i>                                                                               | <i>No Match</i>                         | 0.030145736 | 0     | 113.653  | 267.258 |
| TRINITY_DN64536_c0_g1  | <i>No Match</i>                                                                               | <i>No Match</i>                         | 0.030194722 | 0     | 13.755   | 34.923  |
| TRINITY_DN62765_c0_g1  | Gamma-crystallin M2                                                                           | Metazoa; Chondrichthyes; Galeoidea      | 0.030229089 | 0     | 264.511  | 0       |
| TRINITY_DN70804_c1_g2  | <i>No Match</i>                                                                               | <i>No Match</i>                         | 0.030555968 | 0.135 | 19.247   | 51.868  |
| TRINITY_DN70844_c1_g5  | Gamma-crystallin M2                                                                           | Metazoa; Actinopterygii; Cyprinidae     | 0.030733023 | 0     | 2070.565 | 8.622   |
| TRINITY_DN66352_c0_g1  | Beta-adducin                                                                                  | Metazoa; Actinopterygii; Salmonidae     | 0.030733023 | 0.306 | 56.272   | 46.576  |
| TRINITY_DN69100_c0_g2  | Leucine-rich repeat, immunoglobulin-like domain and transmembrane                             | Metazoa; Mammalia; Hominidae            | 0.030866943 | 0     | 21.737   | 20.99   |
| TRINITY_DN66496_c1_g3  | Retinoschisin                                                                                 | Metazoa; Actinopterygii; Tetraodontidae | 0.030866943 | 0.355 | 53.016   | 95.694  |
| TRINITY_DN69869_c0_g1  | Leucine-rich repeat, immunoglobulin-like domain and transmembrane domain-containing protein 2 | Metazoa; Actinopterygii; Cyprinidae     | 0.031367797 | 0     | 31.099   | 28.933  |
| TRINITY_DN69489_c2_g1  | Serine incorporator 4                                                                         | Metazoa; Mammalia; Muridae              | 0.031367797 | 0     | 18.95    | 48.141  |
| TRINITY_DN71240_c0_g1  | Protein unc-13 homolog B                                                                      | Metazoa; Mammalia; Hominidae            | 0.031367797 | 0     | 1.939    | 5.266   |
| TRINITY_DN70594_c2_g1  | <i>No Match</i>                                                                               | <i>No Match</i>                         | 0.031438803 | 0     | 19.725   | 44.142  |
| TRINITY_DN71195_c1_g1  | Chondroitin sulfate proteoglycan 4                                                            | Metazoa; Mammalia; Muridae              | 0.031662629 | 0.061 | 15.585   | 17.416  |
| TRINITY_DN20507_c0_g1  | <i>No Match</i>                                                                               | <i>No Match</i>                         | 0.031662629 | 0     | 443.356  | 923.904 |
| TRINITY_DN59677_c0_g1  | Protein lifeguard 2                                                                           | Metazoa; Mammalia; Hominidae            | 0.032194022 | 0     | 25.813   | 20.212  |
| TRINITY_DN69087_c1_g2  | Testican-1                                                                                    | Metazoa; Mammalia; Muridae              | 0.032194022 | 0     | 13.006   | 62.598  |
| TRINITY_DN70932_c0_g1  | <i>No Match</i>                                                                               | <i>No Match</i>                         | 0.032491142 | 0     | 1.948    | 15.073  |
| TRINITY_DN67036_c2_g1  | Potassium voltage-gated channel subfamily B                                                   | Metazoa; Mammalia; Bovidae              | 0.032491142 | 0     | 9.272    | 30.381  |

|                        | member 2                                                |                                        |             |    |          |          |
|------------------------|---------------------------------------------------------|----------------------------------------|-------------|----|----------|----------|
| TRINITY_DN69849_c3_g1  | Retinal-specific ATP-binding cassette transporter       | Metazoa; Mammalia; Muridae             | 0.032541445 | 0  | 36.483   | 37.257   |
| TRINITY_DN70844_c1_g8  | Gamma-crystallin M1                                     | Metazoa; Chondrichthyes; Galeoidea     | 0.032541445 | 0  | 766.023  | 2.606    |
| TRINITY_DN69442_c0_g1  | <i>No Match</i>                                         | <i>No Match</i>                        | 0.032597044 | 0  | 57.426   | 38.949   |
| TRINITY_DN62691_c0_g3  | <i>No Match</i>                                         | <i>No Match</i>                        | 0.033051283 | 10 | 1848.968 | 1049.029 |
| TRINITY_DN70566_c1_g1  | <i>No Match</i>                                         | <i>No Match</i>                        | 0.033051283 | 0  | 61.792   | 14.892   |
| TRINITY_DN70790_c0_g1  | LINE-1 reverse transcriptase homolog                    | Metazoa; Mammalia; Lorisidae           | 0.033284891 | 0  | 21.836   | 26.111   |
| TRINITY_DN70162_c4_g1  | <i>No Match</i>                                         | <i>No Match</i>                        | 0.03376548  | 0  | 47.604   | 48.774   |
| TRINITY_DN70564_c4_g2  | Uncharacterized protein                                 | Metazoa; Actinopterygii; Cyprinidae    | 0.033874289 | 0  | 15.153   | 144.305  |
| TRINITY_DN55138_c0_g3  | Estrogen-related receptor gamma                         | Metazoa; Mammalia; Muridae             | 0.0342383   | 0  | 23.694   | 51.778   |
| TRINITY_DN63087_c1_g1  | Synaptosomal-associated protein                         | Metazoa; Actinopterygii; Poeciliidae   | 0.0342383   | 0  | 15.658   | 31.059   |
| TRINITY_DN70363_c2_g1  | Protein phosphatase 1B                                  | Metazoa; Mammalia; Hominidae           | 0.034496225 | 0  | 23.333   | 24.898   |
| TRINITY_DN38696_c0_g1  | <i>No Match</i>                                         | <i>No Match</i>                        | 0.03532047  | 0  | 332.481  | 401.538  |
| TRINITY_DN69322_c0_g1  | Hnf4a protein                                           | Metazoa; Actinopterygii; Cyprinidae    | 0.037897689 | 0  | 6.305    | 34.018   |
| TRINITY_DN26248_c0_g3  | Gamma-crystallin N                                      | Metazoa; Mammalia; Muridae             | 0.03803773  | 0  | 118.776  | 0        |
| TRINITY_DN69905_c1_g1  | Transporter                                             | Metazoa; Actinopterygii; Cichlidae     | 0.03803773  | 0  | 13.15    | 15.697   |
| TRINITY_DN70147_c1_g1  | Hemoglobin subunit alpha-2                              | Metazoa; Actinopterygii; Nototheniidae | 0.038065431 | 0  | 896.199  | 81.345   |
| TRINITY_DN45135_c0_g1  | 60S ribosomal protein L34                               | Metazoa; Actinopterygii; Salmonidae    | 0.038065431 | 0  | 176.446  | 200.579  |
| TRINITY_DN62683_c0_g2  | <i>No Match</i>                                         | <i>No Match</i>                        | 0.038065431 | 0  | 99.276   | 708.189  |
| TRINITY_DN69845_c3_g10 | Regulator of G-protein signaling 8                      | Metazoa; Actinopterygii; Cyprinidae    | 0.040804505 | 0  | 16.018   | 20.094   |
| TRINITY_DN62683_c0_g3  | <i>No Match</i>                                         | <i>No Match</i>                        | 0.040806451 | 0  | 181.551  | 660.066  |
| TRINITY_DN70638_c0_g1  | MAGUK p55 subfamily member 4                            | Metazoa; Mammalia; Hominidae           | 0.041377887 | 0  | 26.778   | 28.164   |
| TRINITY_DN68054_c1_g3  | Voltage-dependent L-type calcium channel subunit beta-4 | Metazoa; Mammalia; Muridae             | 0.041377887 | 0  | 25.056   | 44.459   |
| TRINITY_DN51404_c0_g2  | LINE-1 reverse transcriptase homolog                    | Metazoa; Mammalia; Lorisidae           | 0.042569479 | 0  | 1.091    | 14.81    |
| TRINITY_DN66349_c0_g1  | Clathrin coat assembly protein AP180                    | Metazoa; Mammalia; Hominidae           | 0.042827489 | 0  | 15.793   | 28.924   |
| TRINITY_DN69152_c1_g1  | <i>No Match</i>                                         | <i>No Match</i>                        | 0.042845149 | 0  | 93.585   | 52.791   |

|                        |                                                         |                                       |             |       |         |         |
|------------------------|---------------------------------------------------------|---------------------------------------|-------------|-------|---------|---------|
| TRINITY_DN67377_c0_g1  | <i>No Match</i>                                         | <i>No Match</i>                       | 0.042863988 | 0     | 35.13   | 28.228  |
| TRINITY_DN70242_c1_g2  | F-env                                                   | Viruses; dsDNA viruses, Herpesviridae | 0.043916496 | 0     | 3.04    | 32.57   |
| TRINITY_DN69720_c3_g1  | Uncharacterized protein                                 | Metazoa; Actinopterygii; Cyprinidae   | 0.044604518 | 0     | 43.924  | 36.334  |
| TRINITY_DN70031_c0_g2  | Retinaldehyde-binding protein 1                         | Metazoa; Mammalia; Bovidae            | 0.044632236 | 0     | 29.854  | 55.713  |
| TRINITY_DN60505_c0_g1  | Uncharacterized protein                                 | Metazoa; Actinopterygii; Cichlidae    | 0.044878335 | 0     | 40.452  | 0.072   |
| TRINITY_DN70319_c4_g10 | 1-acyl-sn-glycerol-3-phosphate acyltransferase gamma    | Metazoa; Mammalia; Hominidae          | 0.046191783 | 0.699 | 46.756  | 102.57  |
| TRINITY_DN71080_c0_g1  | <i>No Match</i>                                         | <i>No Match</i>                       | 0.046780535 | 0     | 53.855  | 147.571 |
| TRINITY_DN71037_c1_g3  | LINE-1 reverse transcriptase homolog                    | Metazoa; Mammalia; Lorisidae          | 0.047525552 | 0     | 15.216  | 24.835  |
| TRINITY_DN62096_c0_g1  | <i>No Match</i>                                         | <i>No Match</i>                       | 0.047916694 | 0     | 70.748  | 145.562 |
| TRINITY_DN38168_c0_g1  | <i>No Match</i>                                         | <i>No Match</i>                       | 0.04887804  | 0     | 402.227 | 274.306 |
| TRINITY_DN61625_c0_g1  | Cytochrome c oxidase subunit NDUF4A                     | Metazoa; Actinopterygii; Cyprinidae   | 0.04892844  | 0     | 32.47   | 47.001  |
| TRINITY_DN69982_c0_g2  | <i>No Match</i>                                         | <i>No Match</i>                       | 0.04972214  | 0     | 51.482  | 49.887  |
| TRINITY_DN69058_c1_g3  | Sodium/potassium/calcium exchanger 1                    | Metazoa; Aves; Phasianidae            | 0.04972214  | 0     | 17.155  | 35.285  |
| TRINITY_DN67983_c0_g1  | Pleckstrin homology domain-containing family B member 1 | Metazoa; Mammalia; Muridae            | 0.04972214  | 0     | 21.421  | 63.503  |

---

**Supplementary Table S2. Retina isoforms significantly up-regulated in *Malacosteus* relative to *Pachystomias*. For each isoform, annotation with respect to the most similar protein sequence hit from BLASTx searches (Protein Identity) and the organism from which this sequence derived (Taxon) are given. For differential expression analyses, the multi-test corrected significance level (FDR) and normalized expression values per individual (PM1, MN1, MN2) for each isoform are also given.**

| Isoform ID               | Protein Identity                                                            | Taxon                                   | FDR         | AM1   | MN1       | MN2       |
|--------------------------|-----------------------------------------------------------------------------|-----------------------------------------|-------------|-------|-----------|-----------|
| TRINITY_DN65229_c0_g1_i1 | Guanine nucleotide-binding protein G(t) subunit alpha-1                     | Metazoa; Mammalia; Muridae              | 0.000106274 | 0     | 596.482   | 1093.152  |
| TRINITY_DN50791_c0_g1_i1 | Rhodopsin                                                                   | Metazoa; Actinopterygii; Stomiidae      | 0.000106274 | 1.213 | 8193.735  | 9932.388  |
| TRINITY_DN60692_c0_g1_i4 | Cytochrome c oxidase subunit 1                                              | Metazoa; Actinopterygii; Salmonidae     | 0.000165384 | 0     | 137.725   | 459.121   |
| TRINITY_DN62339_c0_g2_i1 | <i>No Match</i>                                                             | <i>No Match</i>                         | 0.000165384 | 3.798 | 36700.641 | 67444.832 |
| TRINITY_DN38768_c0_g3_i1 | Retinal rod rhodopsin-sensitive cGMP 3',5'-cyclic phosphodiesterase subunit | Metazoa; Mammalia; Bovidae              | 0.000165384 | 0     | 1246.14   | 2739.163  |
| TRINITY_DN44906_c0_g1_i1 | Guanine nucleotide-binding protein subunit gamma                            | Metazoa; Actinopterygii; Gasterosteidae | 0.000174257 | 0     | 1214.613  | 2315.939  |
| TRINITY_DN34250_c0_g1_i1 | NADH-ubiquinone oxidoreductase chain 5                                      | Metazoa; Actinopterygii; Retropinnidae  | 0.000217418 | 0     | 338.876   | 359.5     |
| TRINITY_DN62973_c1_g2_i1 | <i>No Match</i>                                                             | <i>No Match</i>                         | 0.00024554  | 0     | 1728.933  | 1558.328  |
| TRINITY_DN60692_c0_g1_i2 | Cytochrome c oxidase subunit 1                                              | Metazoa; Actinopterygii; Salmonidae     | 0.000323699 | 0.053 | 334.819   | 200.063   |
| TRINITY_DN39938_c0_g2_i1 | <i>No Match</i>                                                             | <i>No Match</i>                         | 0.000337359 | 2.468 | 14317.609 | 5495.267  |
| TRINITY_DN60692_c0_g1_i3 | Cytochrome c oxidase subunit 1                                              | Metazoa; Actinopterygii; Salmonidae     | 0.000345224 | 0     | 63.315    | 193.37    |
| TRINITY_DN48042_c0_g1_i1 | Cytochrome c oxidase subunit 3                                              | Metazoa; Actinopterygii; Stomiidae      | 0.000351328 | 0.17  | 646.484   | 774.562   |
| TRINITY_DN60692_c0_g1_i1 | Cytochrome c oxidase subunit 1                                              | Metazoa; Actinopterygii; Salmonidae     | 0.000389673 | 0     | 142.181   | 90.579    |
| TRINITY_DN69457_c2_g1_i1 | Riboflavin-binding protein                                                  | Metazoa; Actinopterygii; Salmonidae     | 0.000433563 | 0     | 331.3     | 442.555   |
| TRINITY_DN38768_c0_g2_i1 | <i>No Match</i>                                                             | <i>No Match</i>                         | 0.000459045 | 0     | 1128.784  | 2284.497  |
| TRINITY_DN54646_c0_g1_i1 | Guanine nucleotide-binding protein G(I)/G(S)/G(T) subunit beta-1            | Metazoa; Actinopterygii; Cyprinidae     | 0.000486197 | 0     | 134.364   | 259.656   |
| TRINITY_DN69731_c6_g1_i3 | Interphotoreceptor matrix proteoglycan 2                                    | Metazoa; Aves; Phasianidae              | 0.000577596 | 0     | 65.748    | 114.092   |
| TRINITY_DN45697_c1_g1_i1 | Peripherin-2                                                                | Metazoa; Aves; Phasianidae              | 0.000884783 | 0     | 278.745   | 522.552   |
| TRINITY_DN57337_c0_g1_i1 | Peripherin-2                                                                | Metazoa; Mammalia; Canidae              | 0.000996888 | 0     | 174.061   | 353.232   |



|                           |                                                                |                                        |             |       |          |          |
|---------------------------|----------------------------------------------------------------|----------------------------------------|-------------|-------|----------|----------|
| TRINITY_DN57898_c0_g1_i1  | <i>No Match</i>                                                | <i>No Match</i>                        | 0.001681784 | 1.713 | 3130.502 | 5004.886 |
| TRINITY_DN7106_c0_g1_i1   | <i>No Match</i>                                                | <i>No Match</i>                        | 0.001774173 | 0     | 85.717   | 195.121  |
| TRINITY_DN69921_c3_g2_i2  | Rod cGMP-specific 3',5'-cyclic phosphodiesterase subunit alpha | Metazoa; Actinopterygii; Ictaluridae   | 0.00195564  | 0     | 98.816   | 166.08   |
| TRINITY_DN70660_c2_g1_i1  | Prominin-1-A                                                   | Metazoa; Actinopterygii; Cyprinidae    | 0.002410171 | 0     | 31.268   | 92.138   |
| TRINITY_DN69139_c0_g1_i1  | Hemoglobin subunit beta-2                                      | Metazoa; Actinopterygii; Gadidae       | 0.00283629  | 0     | 1134.28  | 72.007   |
| TRINITY_DN69026_c5_g1_i1  | Retinol dehydrogenase 3                                        | Metazoa; Mammalia; Muridae             | 0.002859461 | 0     | 76.712   | 118.507  |
| TRINITY_DN62691_c0_g3_i2  | <i>No Match</i>                                                | <i>No Match</i>                        | 0.002915745 | 0     | 475.839  | 691.963  |
| TRINITY_DN54320_c0_g1_i1  | Creatine kinase, mitochondrial 2                               | Metazoa; Actinopterygii; Salmonidae    | 0.002915745 | 0     | 202.154  | 114.649  |
| TRINITY_DN65214_c0_g1_i1  | <i>No Match</i>                                                | <i>No Match</i>                        | 0.003370432 | 0     | 3465.906 | 102.264  |
| TRINITY_DN59359_c0_g1_i1  | Type-4 ice-structuring protein LS-12                           | Metazoa; Actinopterygii; Cottidae      | 0.003407026 | 0     | 328.719  | 316.97   |
| TRINITY_DN69921_c3_g2_i4  | Rod cGMP-specific 3',5'-cyclic phosphodiesterase subunit beta  | Metazoa; Mammalia; Bovidae             | 0.003675311 | 0     | 91.881   | 107.641  |
| TRINITY_DN70278_c1_g27_i4 | Interphotoreceptor matrix proteoglycan 1                       | Metazoa; Aves; Phasianidae             | 0.004041715 | 0     | 28.937   | 56.656   |
| TRINITY_DN64536_c0_g2_i1  | <i>No Match</i>                                                | <i>No Match</i>                        | 0.004249844 | 0     | 178.295  | 321.172  |
| TRINITY_DN53485_c0_g1_i1  | NADH-ubiquinone oxidoreductase chain 4                         | Metazoa; Actinopterygii; Salmonidae    | 0.004551072 | 0     | 121.961  | 131.59   |
| TRINITY_DN70830_c3_g2_i7  | ATP-binding cassette sub-family A member 1                     | Metazoa; Mammalia; Hominidae           | 0.004551072 | 0     | 58.59    | 58.114   |
| TRINITY_DN70844_c1_g14_i1 | Gamma-crystallin M2                                            | Metazoa; Actinopterygii; Cyprinidae    | 0.005296359 | 0     | 932.052  | 0        |
| TRINITY_DN58067_c0_g2_i1  | Gamma-crystallin M3                                            | Metazoa; Actinopterygii; Cyprinidae    | 0.005296359 | 0     | 1327.903 | 3.129    |
| TRINITY_DN63039_c0_g1_i1  | Complexin-4                                                    | Metazoa; Mammalia; Muridae             | 0.005828635 | 0     | 89.356   | 191.871  |
| TRINITY_DN65797_c0_g1_i2  | RNA-binding protein Musashi homolog 1                          | Metazoa; Mammalia; Hominidae           | 0.006069184 | 0     | 47.672   | 71.4     |
| TRINITY_DN64954_c0_g1_i1  | <i>No Match</i>                                                | <i>No Match</i>                        | 0.006069184 | 0     | 199.48   | 364.502  |
| TRINITY_DN106325_c0_g1_i1 | <i>No Match</i>                                                | <i>No Match</i>                        | 0.006362212 | 0     | 2382.63  | 3.868    |
| TRINITY_DN67956_c0_g1_i4  | <i>No Match</i>                                                | <i>No Match</i>                        | 0.006362212 | 0     | 296.588  | 385.008  |
| TRINITY_DN45697_c1_g2_i1  | Peripherin-2                                                   | Metazoa; Aves; Phasianidae             | 0.006362212 | 0     | 48.433   | 166.211  |
| TRINITY_DN70830_c3_g2_i6  | ATP-binding cassette sub-family A member 1                     | Metazoa; Mammalia; Hominidae           | 0.006926368 | 0     | 41.61    | 24.171   |
| TRINITY_DN63927_c0_g1_i1  | Retinol dehydrogenase 7                                        | Metazoa; Mammalia; Muridae             | 0.007081289 | 0     | 168.333  | 124.329  |
| TRINITY_DN71136_c1_g2_i1  | Calcium-transporting ATPase                                    | Metazoa; Actinopterygii; Gasterosteida | 0.007081289 | 0     | 16.117   | 31.422   |
| TRINITY_DN67660_c0_g1_i1  | Protein LBH                                                    | Metazoa; Mammalia; Bovidae             | 0.007152076 | 0     | 40.756   | 115.378  |
| TRINITY_DN64954_c1_g1_i1  | <i>No Match</i>                                                | <i>No Match</i>                        | 0.007152076 | 0     | 353.656  | 350.599  |

|                           |                                                           |                                                    |             |       |          |         |
|---------------------------|-----------------------------------------------------------|----------------------------------------------------|-------------|-------|----------|---------|
| TRINITY_DN62400_c0_g6_i1  | <i>No Match</i>                                           | <i>No Match</i>                                    | 0.007786225 | 0     | 1608.086 | 1.681   |
| TRINITY_DN79162_c0_g1_i1  | Synaptotagmin-2                                           | Metazoa; Mammalia; Muridae                         | 0.007786225 | 0     | 81.808   | 131.671 |
| TRINITY_DN70717_c0_g1_i4  | Sterile alpha motif domain-containing protein 7           | Metazoa; Mammalia; Hominidae                       | 0.008330354 | 0     | 15.634   | 111.732 |
| TRINITY_DN67162_c3_g1_i1  | Voltage-dependent L-type calcium channel subunit alpha-1F | Metazoa; Mammalia; Hominidae                       | 0.008330354 | 0     | 17.101   | 32.201  |
| TRINITY_DN71259_c1_g1_i2  | Polyprotein                                               | Viruses; Retro-transcribing viruses; Retroviridae; | 0.008528019 | 0     | 0.743    | 24.323  |
| TRINITY_DN70278_c1_g27_i5 | Interphotoreceptor matrix proteoglycan 1                  | Metazoa; Aves; Phasianidae                         | 0.008528019 | 0     | 28.77    | 30.925  |
| TRINITY_DN3114_c0_g1_i1   | Diamine acetyltransferase 1                               | Metazoa; Actinopterygii; Salmonidae                | 0.008528019 | 0     | 87.899   | 134.557 |
| TRINITY_DN65876_c0_g1_i1  | <i>No Match</i>                                           | Metazoa; Actinopterygii; Poeciliidae               | 0.008528019 | 0     | 100.924  | 39.229  |
| TRINITY_DN61263_c0_g1_i1  | Guanylyl cyclase-activating protein 2                     | Metazoa; Actinopterygii; Cyprinidae                | 0.008528019 | 0     | 64.531   | 65.82   |
| TRINITY_DN70565_c0_g2_i2  | S-arrestin                                                | Metazoa; Mammalia; Bovidae                         | 0.009082035 | 0     | 99.949   | 18.622  |
| TRINITY_DN67838_c0_g2_i1  | SEC14-like protein 2                                      | Metazoa; Mammalia; Bovidae                         | 0.009117531 | 0     | 19.942   | 56.899  |
| TRINITY_DN69324_c0_g1_i1  | Retinoid isomerohydrolase                                 | Metazoa; Actinopterygii; Cyprinidae                | 0.009185288 | 0     | 40.858   | 61.628  |
| TRINITY_DN65277_c0_g1_i1  | Homeobox protein otx5-A                                   | Metazoa; Amphibia; Pipidae                         | 0.009334147 | 0.138 | 56.807   | 124.694 |
| TRINITY_DN65306_c1_g1_i2  | Beta-crystallin A1                                        | Metazoa; Amphibia; Ranidae                         | 0.011373512 | 0     | 253.02   | 0       |
| TRINITY_DN58894_c0_g1_i1  | Vesicle-associated membrane protein 2                     | Metazoa; Mammalia; Muridae                         | 0.011443614 | 0     | 36.597   | 41.041  |
| TRINITY_DN70830_c3_g2_i4  | ATP-binding cassette sub-family A member 1                | Metazoa; Mammalia; Hominidae                       | 0.011443614 | 0     | 19.004   | 27.624  |
| TRINITY_DN67956_c0_g1_i2  | <i>No Match</i>                                           | <i>No Match</i>                                    | 0.011563803 | 0     | 260.372  | 188.286 |
| TRINITY_DN67846_c10_g4_i2 | Uncharacterized protein                                   | Metazoa; Actinopterygii; Cyprinidae                | 0.011563803 | 0     | 53.939   | 122.598 |
| TRINITY_DN66896_c0_g1_i1  | NADH-ubiquinone oxidoreductase chain 5                    | Metazoa; Actinopterygii; Retropinnidae             | 0.012754176 | 0     | 14.77    | 27.655  |
| TRINITY_DN38448_c0_g1_i1  | <i>No Match</i>                                           | <i>No Match</i>                                    | 0.012754176 | 0     | 251.107  | 0.435   |
| TRINITY_DN69731_c6_g1_i2  | Interphotoreceptor matrix proteoglycan 2                  | Metazoa; Aves; Phasianidae                         | 0.012865507 | 0     | 1.133    | 30.581  |
| TRINITY_DN57610_c0_g1_i2  | Glucose-6-phosphate 1-dehydrogenase                       | Metazoa; Actinopterygii; Salmonidae                | 0.012865507 | 0     | 27.749   | 46.186  |
| TRINITY_DN70996_c0_g6_i1  | Syntaxin-binding protein 1                                | Metazoa; Mammalia; Muridae                         | 0.013010012 | 0     | 22.792   | 49.406  |
| TRINITY_DN69246_c4_g4_i1  | Uncharacterized protein                                   | Metazoa; Actinopterygii; Adrianichthyidae          | 0.013040934 | 0     | 1141.689 | 7.331   |
| TRINITY_DN53171_c0_g1_i1  | Protein lifeguard 2                                       | Metazoa; Mammalia; Hominidae                       | 0.01308966  | 0     | 69.693   | 137.625 |
| TRINITY_DN70844_c1_g14_i4 | Gamma-crystallin M1                                       | Metazoa; Chondrichthyes; Hemiscylliidae            | 0.013460603 | 4.266 | 6311.833 | 10.673  |
| TRINITY_DN70844_c1_g14_i8 | <i>No Match</i>                                           | <i>No Match</i>                                    | 0.013460603 | 0     | 1553.247 | 1.59    |
| TRINITY_DN58067_c0_g1_i1  | Gamma-crystallin M3                                       | Metazoa; Actinopterygii; Cyprinidae                | 0.014532394 | 0     | 683.313  | 1.448   |

|                          |                                                                            |                                         |             |       |          |         |
|--------------------------|----------------------------------------------------------------------------|-----------------------------------------|-------------|-------|----------|---------|
| TRINITY_DN69731_c4_g1_i1 | <i>No Match</i>                                                            | <i>No Match</i>                         | 0.014532394 | 0     | 61.626   | 132.511 |
| TRINITY_DN61070_c0_g1_i2 | Beta-crystallin B1                                                         | Metazoa; Mammalia; Suidae               | 0.014669308 | 2.734 | 1529.592 | 4.861   |
| TRINITY_DN70417_c2_g1_i2 | Putative ATP-dependent RNA helicase an3                                    | Metazoa; Amphibia; Pipidae              | 0.015080997 | 0     | 0        | 34.885  |
| TRINITY_DN68489_c0_g1_i1 | ATPase, Na <sup>+</sup> /K <sup>+</sup> transporting, alpha 3a polypeptide | Metazoa; Actinopterygii; Cyprinidae     | 0.015080997 | 0     | 1.374    | 52.646  |
| TRINITY_DN70958_c5_g1_i2 | Protein piccolo                                                            | Metazoa; Mammalia; Muridae              | 0.015176303 | 0     | 5.71     | 11.716  |
| TRINITY_DN65962_c7_g1_i1 | Synaptophysin                                                              | Metazoa; Actinopterygii; Salmonidae     | 0.015176303 | 0     | 28.38    | 43.745  |
| TRINITY_DN69432_c3_g1_i1 | <i>No Match</i>                                                            | <i>No Match</i>                         | 0.015176303 | 0     | 83.368   | 196.924 |
| TRINITY_DN71056_c0_g1_i3 | CD36 antigen                                                               | Metazoa; Actinopterygii; Oplegnathidae  | 0.015382124 | 0     | 4.976    | 36.637  |
| TRINITY_DN69731_c6_g1_i1 | Interphotoreceptor matrix proteoglycan 2                                   | Metazoa; Aves; Phasianidae              | 0.015926681 | 0     | 7.863    | 18.936  |
| TRINITY_DN65277_c1_g1_i2 | Homeobox protein otx5                                                      | Metazoa; Amphibia; Pipidae              | 0.016272288 | 0     | 0        | 171.102 |
| TRINITY_DN61880_c0_g1_i1 | Uncharacterized protein C2orf71                                            | Metazoa; Mammalia; Hominidae            | 0.017003039 | 0     | 16.423   | 30.014  |
| TRINITY_DN70830_c3_g2_i1 | ATP-binding cassette sub-family A member 1                                 | Metazoa; Mammalia; Muridae              | 0.01740266  | 0     | 23.525   | 11.473  |
| TRINITY_DN63747_c1_g2_i3 | Beta-crystallin S                                                          | Metazoa; Actinopterygii; Cyprinidae     | 0.01740266  | 0     | 314.924  | 0.466   |
| TRINITY_DN66993_c0_g1_i1 | Aryl-hydrocarbon-interacting protein-like 1                                | Metazoa; Mammalia; Muridae              | 0.017856568 | 0     | 73.694   | 74.093  |
| TRINITY_DN70849_c3_g1_i3 | Retinol-binding protein I, cellular                                        | Metazoa; Actinopterygii; Salmonidae     | 0.017878414 | 0     | 28.91    | 30.237  |
| TRINITY_DN70469_c4_g1_i1 | Monocarboxylate transporter 1                                              | Metazoa; Mammalia; Cricetidae           | 0.017878414 | 0     | 9.135    | 27.999  |
| TRINITY_DN68860_c1_g2_i1 | Heterogeneous nuclear ribonucleoprotein A0                                 | Metazoa; Actinopterygii; Salmonidae     | 0.017878414 | 0     | 37.293   | 77.01   |
| TRINITY_DN67290_c0_g4_i1 | <i>No Match</i>                                                            | <i>No Match</i>                         | 0.017878414 | 0     | 51.933   | 36.525  |
| TRINITY_DN65306_c0_g1_i1 | Beta-crystallin A3                                                         | Metazoa; Mammalia; Muridae              | 0.017878414 | 0     | 180.978  | 0       |
| TRINITY_DN70733_c0_g3_i1 | Phosducin                                                                  | Metazoa; Mammalia; Canidae              | 0.018463211 | 0     | 44.098   | 58.762  |
| TRINITY_DN70793_c2_g1_i6 | Heat shock 90kDa protein 1 beta isoform b                                  | Metazoa; Actinopterygii; Salmonidae     | 0.018484133 | 0     | 12.682   | 47.259  |
| TRINITY_DN63229_c0_g1_i1 | <i>No Match</i>                                                            | <i>No Match</i>                         | 0.018513944 | 0     | 136.935  | 180.003 |
| TRINITY_DN45143_c0_g1_i1 | Elongation factor 1-alpha                                                  | Metazoa; Actinopterygii; Tetraodontidae | 0.018793877 | 0.149 | 57.318   | 68.929  |
| TRINITY_DN67613_c0_g1_i1 | <i>No Match</i>                                                            | <i>No Match</i>                         | 0.01896061  | 0     | 23.674   | 93.88   |
| TRINITY_DN59372_c0_g1_i1 | <i>No Match</i>                                                            | <i>No Match</i>                         | 0.019460029 | 0     | 467.827  | 87.156  |
| TRINITY_DN44906_c0_g2_i1 | Guanine nucleotide-binding protein G(T) subunit gamma-T1                   | Metazoa; Mammalia; Bovidae              | 0.019601124 | 0     | 191.459  | 0.334   |
| TRINITY_DN58487_c0_g1_i1 | Ferritin                                                                   | Metazoa; Actinopterygii; Salmonidae     | 0.020131329 | 0     | 27.016   | 122.426 |
| TRINITY_DN65558_c0_g1_i1 | RBP3-like protein-2                                                        | Metazoa; Actinopterygii; Osmeridae      | 0.020903884 | 0.787 | 241.554  | 102.193 |
| TRINITY_DN70953_c2_g2_i6 | Elongation factor 2                                                        | Metazoa; Mammalia; Muridae              | 0.020982858 | 0     | 51.024   | 0       |

|                           |                                                         |                                               |             |       |         |          |
|---------------------------|---------------------------------------------------------|-----------------------------------------------|-------------|-------|---------|----------|
| TRINITY_DN64187_c0_g1_i1  | Potassium voltage-gated channel subfamily V member 2    | Metazoa; Mammalia; Muridae                    | 0.02127667  | 0     | 23.776  | 44.272   |
| TRINITY_DN69290_c0_g1_i1  | G-protein-coupled receptor kinase 1a                    | Metazoa; Actinopterygii; Cyprinidae           | 0.021303966 | 0.149 | 38.193  | 81.263   |
| TRINITY_DN47315_c0_g2_i1  | <i>No Match</i>                                         | <i>No Match</i>                               | 0.021374739 | 0     | 25.772  | 2236.742 |
| TRINITY_DN70642_c0_g1_i4  | Oxygen-regulated protein 1                              | Metazoa; Mammalia; Bovidae                    | 0.021374739 | 0     | 11.224  | 9.65     |
| TRINITY_DN69097_c0_g1_i2  | Neuronal pentraxin-1                                    | Metazoa; Mammalia; Muridae                    | 0.021393116 | 0     | 21.195  | 28.131   |
| TRINITY_DN69762_c1_g1_i1  | Complement C4                                           | Metazoa; Mammalia; Muridae                    | 0.021393116 | 0     | 11.818  | 12.526   |
| TRINITY_DN66496_c1_g3_i1  | Retinoschisin                                           | Metazoa; Actinopterygii; Tetraodontidae       | 0.022625392 | 0.308 | 54.57   | 107.105  |
| TRINITY_DN39620_c0_g1_i1  | <i>No Match</i>                                         | <i>No Match</i>                               | 0.022625392 | 0     | 281.251 | 205.47   |
| TRINITY_DN65557_c0_g2_i2  | Cystatin                                                | Metazoa; Actinopterygii; Osmeridae            | 0.022625392 | 0     | 29.699  | 79.258   |
| TRINITY_DN38168_c0_g2_i1  | <i>No Match</i>                                         | <i>No Match</i>                               | 0.022926921 | 0     | 500.283 | 643.833  |
| TRINITY_DN70308_c3_g1_i1  | L-lactate dehydrogenase                                 | Metazoa; Actinopterygii; Macrouridae          | 0.023112148 | 0     | 35.288  | 26.713   |
| TRINITY_DN70278_c1_g27_i1 | Interphotoreceptor matrix proteoglycan 1                | Metazoa; Aves; Phasianidae                    | 0.023112148 | 0     | 11.335  | 9.964    |
| TRINITY_DN69742_c4_g1_i1  | <i>No Match</i>                                         | <i>No Match</i>                               | 0.023653044 | 0     | 108.704 | 0.172    |
| TRINITY_DN69281_c1_g1_i6  | Guanylate cyclase                                       | Metazoa; Actinopterygii; Cichlidae            | 0.024060076 | 0     | 13.155  | 21.852   |
| TRINITY_DN70319_c4_g11_i2 | 1-acyl-sn-glycerol-3-phosphate acyltransferase gamma    | Metazoa; Mammalia; Hominidae                  | 0.024458305 | 0.691 | 99.364  | 159.001  |
| TRINITY_DN33844_c0_g2_i1  | <i>No Match</i>                                         | <i>No Match</i>                               | 0.024461727 | 0     | 73.36   | 104.512  |
| TRINITY_DN69299_c1_g1_i1  | Poly(rC)-binding protein 3                              | Metazoa; Mammalia; Hominidae                  | 0.024772938 | 0     | 20.229  | 22.693   |
| TRINITY_DN71102_c3_g4_i1  | Photoreceptor outer segment membrane glycoprotein 2     | Metazoa; Aves; Phasianidae                    | 0.024772938 | 0     | 38.862  | 39.219   |
| TRINITY_DN65876_c0_g1_i2  | <i>No Match</i>                                         | <i>No Match</i>                               | 0.024772938 | 0     | 17.946  | 54.509   |
| TRINITY_DN70883_c0_g1_i1  | Cadherin-related family member 1                        | Metazoa; Actinopterygii; Cyprinidae           | 0.024780767 | 0     | 17.565  | 37.538   |
| TRINITY_DN46053_c0_g1_i1  | <i>No Match</i>                                         | <i>No Match</i>                               | 0.024780767 | 0     | 135.543 | 296.262  |
| TRINITY_DN69018_c0_g1_i3  | Complexin 4a                                            | Metazoa; Actinopterygii; Cyprinidae           | 0.025716439 | 0     | 15.068  | 53.203   |
| TRINITY_DN69921_c4_g1_i2  | <i>No Match</i>                                         | <i>No Match</i>                               | 0.025716439 | 0     | 32.605  | 29.103   |
| TRINITY_DN70804_c1_g2_i1  | <i>No Match</i>                                         | <i>No Match</i>                               | 0.026198867 | 0.117 | 19.812  | 58.053   |
| TRINITY_DN67159_c0_g1_i2  | L-threonine ammonia-lyase                               | Bacteria; Deltaproteobacteria; Geobacteraceae | 0.026858343 | 0     | 0       | 36.161   |
| TRINITY_DN68850_c1_g3_i1  | Basic leucine zipper and W2 domain-containing protein 2 | Metazoa; Actinopterygii; Cyprinidae           | 0.02773233  | 0     | 42.603  | 40.12    |

|                           |                                                                                               |                                        |             |       |          |          |
|---------------------------|-----------------------------------------------------------------------------------------------|----------------------------------------|-------------|-------|----------|----------|
| TRINITY_DN70594_c2_g1_i1  | No Match                                                                                      | No Match                               | 0.02773233  | 0     | 20.304   | 49.406   |
| TRINITY_DN68980_c1_g3_i2  | Vesicle-fusing ATPase                                                                         | Metazoa; Actinopterygii; Salmonidae    | 0.02773233  | 0     | 13.935   | 22.531   |
| TRINITY_DN20507_c0_g1_i1  | No Match                                                                                      | No Match                               | 0.028307419 | 0     | 456.352  | 1034.076 |
| TRINITY_DN71195_c1_g1_i1  | Chondroitin sulfate proteoglycan 4                                                            | Metazoa; Mammalia; Muridae             | 0.028327283 | 0.053 | 16.042   | 19.493   |
| TRINITY_DN70844_c1_g5_i1  | Gamma-crystallin M2                                                                           | Metazoa; Actinopterygii; Cyprinidae    | 0.028327283 | 0     | 2131.263 | 9.65     |
| TRINITY_DN61128_c0_g2_i2  | No Match                                                                                      | No Match                               | 0.028327283 | 0     | 92.336   | 266.035  |
| TRINITY_DN70793_c2_g1_i1  | Heat shock protein HSP 90-alpha 1                                                             | Metazoa; Actinopterygii; Salmonidae    | 0.02871751  | 0     | 28.761   | 47.36    |
| TRINITY_DN59677_c0_g1_i1  | Protein lifeguard 2                                                                           | Metazoa; Mammalia; Hominidae           | 0.0290048   | 0     | 26.57    | 22.622   |
| TRINITY_DN63626_c0_g1_i1  | Scavenger receptor class B type I                                                             | Metazoa; Actinopterygii; Salmonidae    | 0.029047955 | 0     | 13.851   | 27.361   |
| TRINITY_DN65748_c0_g1_i2  | No Match                                                                                      | No Match                               | 0.030002645 | 0     | 42.696   | 120.421  |
| TRINITY_DN69281_c1_g1_i4  | Guanylate cyclase                                                                             | Metazoa; Actinopterygii; Lepisosteidae | 0.030002645 | 0     | 30.924   | 20.587   |
| TRINITY_DN69324_c0_g1_i2  | Retinoid isomerohydrolase                                                                     | Metazoa; Actinopterygii; Cyprinidae    | 0.030002645 | 0.266 | 31.76    | 79.298   |
| TRINITY_DN69869_c0_g1_i1  | Leucine-rich repeat, immunoglobulin-like domain and transmembrane domain-containing protein 2 | Metazoa; Actinopterygii; Cyprinidae    | 0.030153268 | 0     | 17.444   | 31.584   |
| TRINITY_DN70513_c4_g17_i3 | No Match                                                                                      | No Match                               | 0.030206302 | 0     | 141.299  | 188.742  |
| TRINITY_DN71226_c0_g4_i3  | Protocadherin-15                                                                              | Metazoa; Aves; Phasianidae             | 0.030206302 | 0     | 19.951   | 26.834   |
| TRINITY_DN70162_c4_g1_i1  | No Match                                                                                      | No Match                               | 0.030206302 | 0     | 49       | 54.59    |
| TRINITY_DN70844_c1_g8_i1  | Gamma-crystallin M1                                                                           | Metazoa; Aves; Phasianidae             | 0.030206302 | 0     | 788.479  | 2.916    |
| TRINITY_DN63087_c1_g1_i1  | Synaptosomal-associated protein                                                               | Metazoa; Actinopterygii; Poeciliidae   | 0.030267114 | 0     | 16.117   | 34.763   |
| TRINITY_DN70513_c4_g17_i1 | No Match                                                                                      | No Match                               | 0.030267114 | 0     | 132.535  | 145.209  |
| TRINITY_DN38696_c0_g1_i1  | No Match                                                                                      | No Match                               | 0.031597206 | 0     | 342.227  | 449.42   |
| TRINITY_DN70171_c2_g3_i2  | DNA-directed RNA polymerase                                                                   | Metazoa; Actinopterygii; Cyprinidae    | 0.031949726 | 0     | 2.581    | 19.068   |
| TRINITY_DN65277_c1_g1_i1  | Homeobox protein otx5                                                                         | Metazoa; Amphibia; Pipidae             | 0.033037106 | 0.936 | 159.773  | 203.911  |
| TRINITY_DN69394_c0_g1_i2  | Ubiquitin-like modifier activating enzyme 1                                                   | Metazoa; Actinopterygii; Cyprinidae    | 0.033663263 | 0     | 11.308   | 13.529   |
| TRINITY_DN69905_c1_g1_i1  | Transporter                                                                                   | Metazoa; Actinopterygii; Cichlidae     | 0.033663263 | 0     | 13.536   | 17.569   |
| TRINITY_DN70513_c4_g17_i4 | No Match                                                                                      | No Match                               | 0.03380606  | 0     | 210.76   | 208.984  |
| TRINITY_DN70483_c4_g1_i1  | Uncharacterized protein C2orf71                                                               | Metazoa; Mammalia; Hominidae           | 0.033811013 | 0     | 4.586    | 12.597   |
| TRINITY_DN45135_c0_g1_i1  | 60S ribosomal protein L34                                                                     | Metazoa; Actinopterygii; Salmonidae    | 0.033866898 | 0     | 181.618  | 224.497  |
| TRINITY_DN55138_c0_g3_i2  | Estrogen-related receptor gamma                                                               | Metazoa; Mammalia; Muridae             | 0.033866898 | 0     | 24.388   | 47.745   |

|                          |                                                                     |                                         |             |       |         |         |
|--------------------------|---------------------------------------------------------------------|-----------------------------------------|-------------|-------|---------|---------|
| TRINITY_DN69920_c2_g1_i2 | Retinal-specific ATP-binding cassette transporter                   | Metazoa; Mammalia; Hominidae            | 0.033866898 | 0     | 12.663  | 16.415  |
| TRINITY_DN70729_c1_g1_i1 | Protein 4.1                                                         | Metazoa; Mammalia; Canidae              | 0.033866898 | 0     | 9.841   | 14.561  |
| TRINITY_DN60428_c1_g1_i2 | <i>No Match</i>                                                     | <i>No Match</i>                         | 0.033866898 | 0     | 30.395  | 32.961  |
| TRINITY_DN70790_c0_g1_i1 | LINE-1 reverse transcriptase homolog                                | Metazoa; Mammalia; Lorisidae            | 0.033877879 | 0     | 20.044  | 21.275  |
| TRINITY_DN26248_c0_g3_i1 | Gamma-crystallin N                                                  | Metazoa; Mammalia; Muridae              | 0.034477731 | 0     | 122.258 | 0       |
| TRINITY_DN62683_c0_g3_i1 | <i>No Match</i>                                                     | <i>No Match</i>                         | 0.034507291 | 0     | 186.873 | 738.776 |
| TRINITY_DN62765_c0_g1_i3 | Gamma-crystallin M2                                                 | Metazoa; Chondrichthyes; Hemiscylliidae | 0.034507291 | 0     | 123.567 | 0       |
| TRINITY_DN51487_c0_g1_i2 | <i>No Match</i>                                                     | <i>No Match</i>                         | 0.034670189 | 0     | 169.326 | 188.6   |
| TRINITY_DN70147_c1_g1_i1 | Hemoglobin subunit alpha-2                                          | Metazoa; Actinopterygii; Nototheniidae  | 0.034687165 | 0     | 922.471 | 91.045  |
| TRINITY_DN51404_c0_g2_i1 | LINE-1 reverse transcriptase homolog                                | Metazoa; Mammalia; Lorisidae            | 0.035609553 | 0     | 1.123   | 16.577  |
| TRINITY_DN66352_c0_g1_i5 | Beta-adducin                                                        | Metazoa; Actinopterygii; Salmonidae     | 0.036434353 | 0     | 17.853  | 32.039  |
| TRINITY_DN68935_c0_g1_i2 | Pyruvate carboxylase                                                | Metazoa; Actinopterygii; Cyprinidae     | 0.036643284 | 0     | 5.942   | 11.098  |
| TRINITY_DN70849_c3_g1_i1 | Retinol-binding protein I, cellular                                 | Metazoa; Mammalia; Hominidae            | 0.036643284 | 0     | 40.505  | 45.811  |
| TRINITY_DN66349_c0_g1_i1 | Clathrin coat assembly protein AP180                                | Metazoa; Mammalia; Hominidae            | 0.037157123 | 0     | 16.256  | 32.373  |
| TRINITY_DN57024_c0_g1_i2 | EGF-like repeat and discoidin I-like domain-containing protein 3    | Metazoa; Mammalia; Hominidae            | 0.038191096 | 0     | 20.573  | 48.373  |
| TRINITY_DN68529_c1_g1_i5 | Probable ATP-dependent RNA helicase DDX6                            | Metazoa; Aves; Phasianidae              | 0.038950291 | 0     | 5.19    | 11.848  |
| TRINITY_DN70031_c0_g2_i1 | Retinaldehyde-binding protein 1                                     | Metazoa; Mammalia; Bovidae              | 0.039162356 | 0     | 30.729  | 62.357  |
| TRINITY_DN58241_c0_g1_i1 | <i>No Match</i>                                                     | <i>No Match</i>                         | 0.039198615 | 0     | 102.094 | 61.618  |
| TRINITY_DN70616_c1_g1_i2 | Synembryn-A                                                         | Metazoa; Amphibia; Pipidae              | 0.039415015 | 0     | 31.5    | 12.374  |
| TRINITY_DN62683_c0_g2_i2 | <i>No Match</i>                                                     | <i>No Match</i>                         | 0.03949289  | 0     | 102.186 | 727.931 |
| TRINITY_DN67289_c4_g1_i2 | Cyclic nucleotide-gated channel rod photoreceptor subunit alpha     | Metazoa; Aves; Phasianidae              | 0.0397151   | 0     | 13.443  | 28.515  |
| TRINITY_DN70660_c2_g1_i2 | Prominin-1-A                                                        | Metazoa; Actinopterygii; Cyprinidae     | 0.040149253 | 0.096 | 14.501  | 29.538  |
| TRINITY_DN70872_c2_g3_i2 | Putative dystrophin                                                 | Metazoa; Actinopterygii; Tetraodontidae | 0.040463864 | 0     | 1.615   | 13.842  |
| TRINITY_DN69654_c0_g4_i2 | Amino acid transporter                                              | Metazoa; Actinopterygii; Cichlidae      | 0.040463864 | 0     | 6.972   | 10.4    |
| TRINITY_DN70573_c4_g4_i2 | Protein furry homolog                                               | Metazoa; Mammalia; Hominidae            | 0.040463864 | 0     | 5.227   | 22.956  |
| TRINITY_DN69850_c1_g9_i2 | Serine/threonine-protein phosphatase 2A 55 kDa regulatory subunit B | Metazoa; Actinopterygii; Cyprinidae     | 0.040463864 | 0     | 11.651  | 24.556  |

|                           |                                                                |                                           |             |       |          |         |
|---------------------------|----------------------------------------------------------------|-------------------------------------------|-------------|-------|----------|---------|
| TRINITY_DN62096_c0_g1_i1  | No Match                                                       | No Match                                  | 0.040463864 | 0     | 72.822   | 162.92  |
| TRINITY_DN68572_c0_g1_i2  | Lengsin                                                        | Metazoa; Mammalia; Canidae                | 0.040463864 | 0     | 40.338   | 0       |
| TRINITY_DN60428_c1_g1_i1  | No Match                                                       | No Match                                  | 0.040463864 | 0     | 7.427    | 48.666  |
| TRINITY_DN69281_c0_g1_i2  | Retinal guanylyl cyclase 2                                     | Metazoa; Mammalia; Bovidae                | 0.040463864 | 0     | 16.534   | 18.328  |
| TRINITY_DN70781_c1_g2_i1  | No Match                                                       | No Match                                  | 0.040463864 | 0     | 37.636   | 75.227  |
| TRINITY_DN70844_c1_g14_i5 | Gamma-crystallin M2                                            | Metazoa; Actinopterygii; Cyprinidae       | 0.040463864 | 3.17  | 1029.328 | 2.309   |
| TRINITY_DN69070_c0_g1_i3  | Importin subunit alpha                                         | Metazoa; Mammalia; Cebidae                | 0.040463864 | 0     | 7.306    | 17.103  |
| TRINITY_DN69246_c4_g14_i1 | Uncharacterized protein                                        | Metazoa; Actinopterygii; Adrianichthyidae | 0.040463864 | 0     | 528.515  | 4.263   |
| TRINITY_DN69559_c2_g1_i6  | No Match                                                       | No Match                                  | 0.040465031 | 0     | 27.693   | 8.344   |
| TRINITY_DN70736_c3_g2_i11 | Voltage-dependent calcium channel subunit alpha-2/delta-4      | Metazoa; Mammalia; Muridae                | 0.040716599 | 0     | 8.244    | 19.402  |
| TRINITY_DN61625_c0_g1_i1  | NADH dehydrogenase (Ubiquinone) 1 alpha subcomplex 4, like     | Metazoa; Actinopterygii; Cyprinidae       | 0.040897749 | 0     | 33.422   | 52.606  |
| TRINITY_DN70736_c3_g2_i2  | Voltage-dependent calcium channel subunit alpha-2/delta-4      | Metazoa; Mammalia; Muridae                | 0.040897749 | 0     | 15.337   | 19.108  |
| TRINITY_DN71240_c0_g1_i1  | Protein unc-13 homolog B                                       | Metazoa; Mammalia; Hominidae              | 0.040897749 | 0     | 1.532    | 4.263   |
| TRINITY_DN69215_c6_g3_i2  | Nuclear receptor ROR-beta                                      | Metazoa; Mammalia; Hominidae              | 0.041152071 | 0     | 9.293    | 13.316  |
| TRINITY_DN70053_c3_g2_i1  | Muscleblind-like protein 2a                                    | Metazoa; Actinopterygii; Tetraodontidae   | 0.041152071 | 0     | 26.988   | 135.215 |
| TRINITY_DN38168_c0_g1_i1  | No Match                                                       | No Match                                  | 0.041152071 | 0     | 414.019  | 307.016 |
| TRINITY_DN67491_c7_g1_i2  | Uncharacterized protein                                        | Metazoa; Actinopterygii; Lepisosteidae    | 0.041827718 | 0     | 6.656    | 38.459  |
| TRINITY_DN68754_c1_g1_i1  | Amyloid-like protein 2                                         | Metazoa; Mammalia; Hominidae              | 0.041827718 | 0     | 1.402    | 25.558  |
| TRINITY_DN69921_c3_g2_i1  | Rod cGMP-specific 3',5'-cyclic phosphodiesterase subunit alpha | Metazoa; Actinopterygii; Ictaluridae      | 0.041827718 | 0     | 16.581   | 16.658  |
| TRINITY_DN70896_c0_g1_i9  | Photoreceptor-specific nuclear receptor                        | Metazoa; Mammalia; Bovidae                | 0.041898803 | 0     | 8.634    | 28.525  |
| TRINITY_DN69982_c0_g2_i1  | No Match                                                       | No Match                                  | 0.041970841 | 0     | 43.68    | 55.836  |
| TRINITY_DN69297_c0_g1_i1  | LOC560210 protein                                              | Metazoa; Actinopterygii; Cyprinidae       | 0.042367759 | 0.543 | 0.446    | 151.893 |
| TRINITY_DN70041_c1_g1_i1  | Cathepsin F                                                    | Metazoa; Actinopterygii; Salmonidae       | 0.042401928 | 0     | 31.769   | 24.07   |
| TRINITY_DN64536_c0_g2_i2  | No Match                                                       | No Match                                  | 0.042848002 | 0     | 10.212   | 81.101  |
| TRINITY_DN69559_c2_g1_i3  | No Match                                                       | No Match                                  | 0.042848002 | 0     | 2.618    | 32.343  |
| TRINITY_DN70471_c1_g5_i8  | Inosine-5'-monophosphate dehydrogenase                         | Metazoa; Actinopterygii; Salmonidae       | 0.042848002 | 0     | 12.542   | 27.827  |



|                           |                                                               |                                               |             |       |         |         |
|---------------------------|---------------------------------------------------------------|-----------------------------------------------|-------------|-------|---------|---------|
| TRINITY_DN59065_c0_g1_i1  | No Match                                                      | No Match                                      | 0.04357932  | 0     | 13.675  | 18.541  |
| TRINITY_DN71166_c0_g1_i1  | Androgen receptor                                             | Metazoa; Mammalia; Leporidae                  | 0.043884219 | 0     | 9.748   | 9.124   |
| TRINITY_DN70513_c4_g13_i1 | No Match                                                      | No Match                                      | 0.044193483 | 0     | 298.705 | 319.451 |
| TRINITY_DN70375_c0_g1_i1  | Follistatin-related protein 5                                 | Metazoa; Mammalia; Muridae                    | 0.0447622   | 0.298 | 27.118  | 54.276  |
| TRINITY_DN70319_c4_g10_i2 | 1-acyl-sn-glycerol-3-phosphate acyltransferase gamma          | Metazoa; Mammalia; Hominidae                  | 0.044779865 | 0     | 24.249  | 54.529  |
| TRINITY_DN62566_c1_g1_i1  | Transposon Ty3-G Gag-Pol polyprotein                          | Fungi; Saccharomycetes;<br>Saccharomycetaceae | 0.044779865 | 0     | 0.566   | 11.24   |
| TRINITY_DN60505_c0_g1_i2  | SPARC                                                         | Metazoa; Aves; Phasianidae                    | 0.044779865 | 0     | 37.284  | 0.081   |
| TRINITY_DN68980_c1_g3_i1  | Vesicle-fusing ATPase                                         | Metazoa; Actinopterygii; Salmonidae           | 0.045062268 | 0     | 4.419   | 21.062  |
| TRINITY_DN70513_c3_g2_i1  | No Match                                                      | No Match                                      | 0.045062268 | 0     | 320.392 | 250.583 |
| TRINITY_DN70483_c4_g1_i2  | Uncharacterized protein C2orf71                               | Metazoa; Mammalia; Hominidae                  | 0.045158588 | 0     | 5.134   | 15.868  |
| TRINITY_DN55272_c0_g1_i1  | RNA-directed DNA polymerase from mobile element jockey        | Metazoa; Insecta; Drosophilidae               | 0.045828549 | 0     | 28.288  | 20.718  |
| TRINITY_DN70006_c1_g1_i1  | Delta and Notch-like epidermal growth factor-related receptor | Metazoa; Mammalia; Hominidae                  | 0.046379758 | 0     | 5.273   | 19.655  |
| TRINITY_DN70932_c0_g1_i3  | No Match                                                      | No Match                                      | 0.046485943 | 0     | 1.355   | 10.116  |
| TRINITY_DN59240_c0_g4_i1  | Prothymosin alpha-A                                           | Metazoa; Actinopterygii; Cyprinidae           | 0.04684     | 0     | 74.131  | 107.115 |
| TRINITY_DN69968_c2_g3_i3  | Transcriptional regulator ATRX                                | Metazoa; Mammalia; Hominidae                  | 0.047199277 | 0     | 6.536   | 9.741   |
| TRINITY_DN35711_c0_g1_i1  | No Match                                                      | No Match                                      | 0.047311224 | 0     | 41.87   | 95.672  |
| TRINITY_DN70519_c4_g1_i4  | Protein disulfide-isomerase TMX3                              | Metazoa; Mammalia; Hominidae                  | 0.047790599 | 0     | 8.578   | 7.22    |
| TRINITY_DN67290_c0_g2_i1  | Glycerol-3-phosphate acyltransferase 1, mitochondrial         | Metazoa; Mammalia; Muridae                    | 0.047790599 | 0.287 | 37.803  | 34.763  |
| TRINITY_DN65272_c0_g1_i2  | CNG-modulin                                                   | Metazoa; Actinopterygii; Moronidae            | 0.048236015 | 0     | 18.985  | 32.272  |
| TRINITY_DN55404_c0_g1_i1  | No Match                                                      | No Match                                      | 0.048236015 | 0     | 37.85   | 116.411 |
| TRINITY_DN68364_c0_g1_i1  | Retinal-specific ATP-binding cassette transporter             | Metazoa; Mammalia; Muridae                    | 0.048236015 | 0     | 16.423  | 24.293  |
| TRINITY_DN67613_c0_g1_i2  | No Match                                                      | No Match                                      | 0.048236015 | 0     | 2.794   | 78.62   |
| TRINITY_DN56658_c0_g1_i1  | No Match                                                      | No Match                                      | 0.048360473 | 0     | 57.318  | 371.499 |
| TRINITY_DN70519_c4_g1_i1  | Protein disulfide-isomerase TMX3                              | Metazoa; Mammalia; Hominidae                  | 0.048751367 | 0     | 16.228  | 13.761  |
| TRINITY_DN70896_c0_g1_i8  | Photoreceptor-specific nuclear receptor                       | Metazoa; Mammalia; Muridae                    | 0.049148161 | 0     | 5.366   | 26.115  |
| TRINITY_DN65748_c0_g1_i1  | No Match                                                      | No Match                                      | 0.049279103 | 0     | 7.938   | 97.799  |



**Supplementary Table S3. Gene ontology terms significantly enriched in genes up-regulated in *Malacosteus* relative to *Pachystomias***

| Category   | Term                                                           | Ontology* | FDR         |
|------------|----------------------------------------------------------------|-----------|-------------|
| GO:0007601 | visual perception                                              | BP        | 2.54E-21    |
| GO:0050953 | sensory perception of light stimulus                           | BP        | 2.54E-21    |
| GO:0007600 | sensory perception                                             | BP        | 2.77E-16    |
| GO:0009583 | detection of light stimulus                                    | BP        | 1.99E-13    |
| GO:0050877 | neurological system process                                    | BP        | 2.94E-13    |
| GO:0009416 | response to light stimulus                                     | BP        | 4.48E-10    |
| GO:0007602 | phototransduction                                              | BP        | 1.25E-09    |
| GO:0009581 | detection of external stimulus                                 | BP        | 1.29E-09    |
| GO:0009582 | detection of abiotic stimulus                                  | BP        | 1.33E-09    |
| GO:0009584 | detection of visible light                                     | BP        | 3.31E-09    |
| GO:0051606 | detection of stimulus                                          | BP        | 3.61E-09    |
| GO:0001750 | photoreceptor outer segment                                    | CC        | 3.90E-09    |
| GO:0009314 | response to radiation                                          | BP        | 4.62E-09    |
| GO:0003008 | system process                                                 | BP        | 9.11E-09    |
| GO:0097458 | neuron part                                                    | CC        | 7.81E-08    |
| GO:0031513 | nonmotile primary cilium                                       | CC        | 9.27E-08    |
| GO:0072372 | primary cilium                                                 | CC        | 1.49E-06    |
| GO:0097381 | photoreceptor disc membrane                                    | CC        | 2.02E-06    |
| GO:0007468 | regulation of rhodopsin gene expression                        | BP        | 5.41E-06    |
| GO:0045872 | positive regulation of rhodopsin gene expression               | BP        | 5.41E-06    |
| GO:0060170 | ciliary membrane                                               | CC        | 5.96E-05    |
| GO:0050908 | detection of light stimulus involved in visual perception      | BP        | 6.95E-05    |
| GO:0050962 | detection of light stimulus involved in sensory perception     | BP        | 6.95E-05    |
| GO:0005215 | transporter activity                                           | MF        | 8.16E-05    |
| GO:0009628 | response to abiotic stimulus                                   | BP        | 8.29E-05    |
| GO:0005929 | cilium                                                         | CC        | 0.00012254  |
| GO:0022890 | inorganic cation transmembrane transporter activity            | MF        | 0.000146987 |
| GO:0007603 | phototransduction, visible light                               | BP        | 0.000166326 |
| GO:0001917 | photoreceptor inner segment                                    | CC        | 0.000189183 |
| GO:0060041 | retina development in camera-type eye                          | BP        | 0.00025176  |
| GO:0050906 | detection of stimulus involved in sensory perception           | BP        | 0.000297919 |
| GO:0009605 | response to external stimulus                                  | BP        | 0.000314382 |
| GO:0034703 | cation channel complex                                         | CC        | 0.000692165 |
| GO:0022843 | voltage-gated cation channel activity                          | MF        | 0.000816449 |
| GO:0015077 | monovalent inorganic cation transmembrane transporter activity | MF        | 0.000991237 |
| GO:0044425 | membrane part                                                  | CC        | 0.0010201   |
| GO:0044707 | single-multicellular organism process                          | BP        | 0.0010201   |
| GO:0032501 | multicellular organismal process                               | BP        | 0.001080972 |
| GO:0008324 | cation transmembrane transporter activity                      | MF        | 0.00121961  |
| GO:0006811 | ion transport                                                  | BP        | 0.001701798 |

|            |                                                                                     |    |             |
|------------|-------------------------------------------------------------------------------------|----|-------------|
| GO:0046873 | metal ion transmembrane transporter activity                                        | MF | 0.001763935 |
| GO:0022400 | regulation of rhodopsin mediated signaling pathway                                  | BP | 0.001999905 |
|            | regulation of G-protein coupled receptor protein signaling pathway                  | BP | 0.002156795 |
| GO:0008277 | substrate-specific transporter activity                                             | MF | 0.002626105 |
| GO:0016056 | rhodopsin mediated signaling pathway                                                | BP | 0.002659984 |
| GO:0005244 | voltage-gated ion channel activity                                                  | MF | 0.003257917 |
| GO:0022832 | voltage-gated channel activity                                                      | MF | 0.003358873 |
| GO:0005261 | cation channel activity                                                             | MF | 0.004182037 |
| GO:0042706 | eye photoreceptor cell fate commitment                                              | BP | 0.004182037 |
| GO:0046552 | photoreceptor cell fate commitment                                                  | BP | 0.004182037 |
| GO:0022857 | transmembrane transporter activity                                                  | MF | 0.005779595 |
| GO:0015075 | ion transmembrane transporter activity                                              | MF | 0.005779595 |
| GO:0016021 | integral component of membrane                                                      | CC | 0.006558404 |
| GO:0005212 | structural constituent of eye lens                                                  | MF | 0.006558404 |
| GO:0022891 | substrate-specific transmembrane transporter activity                               | MF | 0.010579876 |
| GO:0031224 | intrinsic component of membrane                                                     | CC | 0.010705711 |
| GO:0030553 | cGMP binding                                                                        | MF | 0.010962567 |
| GO:0050896 | response to stimulus                                                                | BP | 0.011415041 |
| GO:0034702 | ion channel complex                                                                 | CC | 0.017851406 |
| GO:0005891 | voltage-gated calcium channel complex                                               | CC | 0.017851406 |
| GO:0008137 | NADH dehydrogenase (ubiquinone) activity                                            | MF | 0.0198659   |
| GO:0050136 | NADH dehydrogenase (quinone) activity                                               | MF | 0.0198659   |
| GO:0003954 | NADH dehydrogenase activity                                                         | MF | 0.021434035 |
| GO:0044459 | plasma membrane part                                                                | CC | 0.022955546 |
| GO:0070469 | respiratory chain                                                                   | CC | 0.022972051 |
|            | oxidoreductase activity, acting on NAD(P)H, quinone or similar compound as acceptor | MF | 0.022972051 |
| GO:0016655 | transmembrane transporter complex                                                   | CC | 0.030309848 |
| GO:1902495 | transmembrane transport                                                             | BP | 0.030309848 |
| GO:0055085 | voltage-gated potassium channel activity                                            | MF | 0.030309848 |
| GO:0005249 | cellular response to light stimulus                                                 | BP | 0.030309848 |
| GO:0071482 | transporter complex                                                                 | CC | 0.031483852 |
| GO:1990351 | ion channel activity                                                                | MF | 0.033780214 |
| GO:0005216 | retina homeostasis                                                                  | BP | 0.034978258 |
| GO:0001895 | potassium ion transmembrane transporter activity                                    | MF | 0.035828015 |
| GO:0015079 | substrate-specific channel activity                                                 | MF | 0.035962758 |
| GO:0022838 | calcium channel complex                                                             | CC | 0.036256495 |
| GO:0034704 | channel activity                                                                    | MF | 0.040022515 |
| GO:0015267 | passive transmembrane transporter activity                                          | MF | 0.040022515 |
| GO:0022803 | eye photoreceptor cell development                                                  | BP | 0.041446858 |
| GO:0042462 | modulation of synaptic transmission                                                 | BP | 0.041446858 |
| GO:0050804 | heterotrimeric G-protein complex                                                    | CC | 0.043328608 |
| GO:0005834 | retinol metabolic process                                                           | BP | 0.049616254 |

---

\*GO term ontology: CC = Cellular component, MF = Molecular Function, BP = Biological Process

**Supplementary Table S4. Taxonomic identity and diversity of assigned reads following normalization of transcript number from the *Malacosteus* and *Pachystomias* retina metatranscriptomes**

| Assigned Taxonomic Clade*                        | <i>Malacosteus</i> # Transcripts | <i>Pachystomias</i> # Transcripts | <i>Malacosteus</i> % Total reads | <i>Pachystomias</i> % Total reads |
|--------------------------------------------------|----------------------------------|-----------------------------------|----------------------------------|-----------------------------------|
| Metazoa                                          | 2340                             | 1537                              | 75.53                            | 69.58                             |
| Gammaproteobacteria                              | 148                              | 131                               | 4.78                             | 5.93                              |
| Bacilli                                          | 111                              | 117                               | 3.58                             | 5.30                              |
| Actinobacteria                                   | 72                               | 102                               | 2.32                             | 4.62                              |
| Fungi                                            | 71                               | 61                                | 2.29                             | 2.76                              |
| Streptophyta                                     | 49                               | 51                                | 1.58                             | 2.31                              |
| Betaproteobacteria                               | 43                               | 32                                | 1.39                             | 1.45                              |
| Alphaproteobacteria                              | 42                               | 45                                | 1.36                             | 2.04                              |
| Clostridia                                       | 41                               | 30                                | 1.32                             | 1.36                              |
| Apicomplexa                                      | 28                               | 5                                 | 0.90                             | 0.23                              |
| Bacteroidetes                                    | 26                               | 24                                | 0.84                             | 1.09                              |
| delta/epsilon subdivisions                       | 18                               | 9                                 | 0.58                             | 0.41                              |
| Oscillatoriothricaceae                           | 11                               | 3                                 | 0.36                             | 0.14                              |
| Chlorophyta                                      | 8                                | 5                                 | 0.26                             | 0.23                              |
| Spirochaetia                                     | 7                                | 6                                 | 0.23                             | 0.27                              |
| Nostocales                                       | 6                                | 0                                 | 0.19                             | 0.00                              |
| Kinetoplastida                                   | 6                                | 0                                 | 0.19                             | 0.00                              |
| Chlamydiae                                       | 5                                | 4                                 | 0.16                             | 0.18                              |
| Negativicutes                                    | 4                                | 1                                 | 0.13                             | 0.05                              |
| Ciliophora                                       | 4                                | 4                                 | 0.13                             | 0.18                              |
| Stigonematales                                   | 3                                | 0                                 | 0.10                             | 0.00                              |
| Pyrenomonadales                                  | 3                                | 1                                 | 0.10                             | 0.05                              |
| Herpesviridae                                    | 3                                | 0                                 | 0.10                             | 0.00                              |
| uncultured bacterium CSL142                      | 2                                | 3                                 | 0.06                             | 0.14                              |
| Erysipelotrichia                                 | 2                                | 6                                 | 0.06                             | 0.27                              |
| Fusobacteriia                                    | 2                                | 1                                 | 0.06                             | 0.05                              |
| unclassified Bacteria (miscellaneous)            | 2                                | 0                                 | 0.06                             | 0.00                              |
| Halobacteria                                     | 2                                | 0                                 | 0.06                             | 0.00                              |
| Methanomicrobia                                  | 2                                | 0                                 | 0.06                             | 0.00                              |
| Oomycetes                                        | 2                                | 0                                 | 0.06                             | 0.00                              |
| unclassified Mimiviridae                         | 2                                | 0                                 | 0.06                             | 0.00                              |
| unclassified Retroviridae                        | 2                                | 2                                 | 0.06                             | 0.09                              |
| synthetic construct Cloning vector pT2/Gene-Trap | 2                                | 1                                 | 0.06                             | 0.05                              |
| Chlorobi                                         | 1                                | 0                                 | 0.03                             | 0.00                              |
| Verrucomicrobia                                  | 1                                | 0                                 | 0.03                             | 0.00                              |
| Deinococci                                       | 1                                | 2                                 | 0.03                             | 0.09                              |
| uncultured bacterium                             | 1                                | 1                                 | 0.03                             | 0.05                              |
| uncultured bacterium                             | 1                                | 1                                 | 0.03                             | 0.05                              |

|                         |             |             |               |               |
|-------------------------|-------------|-------------|---------------|---------------|
| 122006-I05              |             |             |               |               |
| uncultured bacterium    |             |             |               |               |
| 4050020-J15             | 1           | 1           | 0.03          | 0.05          |
| Thermotogae             | 1           | 0           | 0.03          | 0.00          |
| Omnitrophica            | 1           | 0           | 0.03          | 0.00          |
| Chromerida              | 1           | 1           | 0.03          | 0.05          |
| Perkinsea               | 1           | 1           | 0.03          | 0.05          |
| Archamoebae             | 1           | 0           | 0.03          | 0.00          |
| Discosea                | 1           | 0           | 0.03          | 0.00          |
| Mycetozoa               | 1           | 0           | 0.03          | 0.00          |
| Diplomonadida           | 1           | 0           | 0.03          | 0.00          |
| Isochrysidales          | 1           | 0           | 0.03          | 0.00          |
| Prymnesiales            | 1           | 0           | 0.03          | 0.00          |
| Bacillariophyta         | 1           | 1           | 0.03          | 0.05          |
| Eustigmatophyceae       | 1           | 1           | 0.03          | 0.05          |
| PX clade                | 1           | 1           | 0.03          | 0.05          |
| Asfivirus               | 1           | 0           | 0.03          | 0.00          |
| Podoviridae             | 1           | 1           | 0.03          | 0.05          |
| Lymphocystivirus        | 1           | 0           | 0.03          | 0.00          |
| Megalocytivirus         | 1           | 0           | 0.03          | 0.00          |
| unclassified            |             |             |               |               |
| Phycodnaviridae         | 1           | 0           | 0.03          | 0.00          |
| Chordopoxvirinae        | 1           | 0           | 0.03          | 0.00          |
| Mononegavirales         | 1           | 0           | 0.03          | 0.00          |
| unclassified ssRNA      |             |             |               |               |
| positive-strand viruses | 1           | 0           | 0.03          | 0.00          |
| Prochlorales            | 0           | 1           | 0.00          | 0.05          |
| uncultured bacterium    |             |             |               |               |
| FGYC_13M19              | 0           | 1           | 0.00          | 0.05          |
| Acidobacteria           | 0           | 2           | 0.00          | 0.09          |
| Planctomycetia          | 0           | 2           | 0.00          | 0.09          |
| Mollicutes              | 0           | 3           | 0.00          | 0.14          |
| Parcubacteria           | 0           | 1           | 0.00          | 0.05          |
| Choanoflagellida        | 0           | 1           | 0.00          | 0.05          |
| Bangiophyceae           | 0           | 1           | 0.00          | 0.05          |
| Chlorovirus             | 0           | 2           | 0.00          | 0.09          |
| Astroviridae            | 0           | 1           | 0.00          | 0.05          |
| uncultured prokaryote   | 0           | 1           | 0.00          | 0.05          |
| Cloning vector pLMB51   | 0           | 1           | 0.00          | 0.05          |
| <b>Total</b>            | <b>3098</b> | <b>2209</b> | <b>100.00</b> | <b>100.00</b> |

\*Taxonomic clades derived from level 4 of the NCBI taxonomy

**Supplementary Table S5. Identity of transcripts of putatively bacterial origin from *Malacosteus* and *Pachystomias* retinae overlapping in gene ontology (GO) term annotation with GO terms directly associated with the search term 'Bacteriochlorophyll' (S% = 100) and those recorded as being co-annotated with these search terms in previous studies (S% < 100)**

| GO Name                                                                    | GO Term    | Aspect* | S%        | <i>Malacosteus</i> |    | <i>Pachystomias</i> |    |
|----------------------------------------------------------------------------|------------|---------|-----------|--------------------|----|---------------------|----|
|                                                                            |            |         |           | RefSeq             | BC | RefSeq              | BC |
| Bacteriochlorophyll binding                                                | GO:0042314 | MF      | 100       |                    |    |                     |    |
| Bacteriochlorophyll c binding                                              | GO:0016169 | MF      | 100       |                    |    |                     |    |
| Bacteriochlorophyll metabolic process                                      | GO:0030493 | BP      | 100       |                    |    |                     |    |
| Bacteriochlorophyll catabolic process                                      | GO:0030495 | BP      | 100       |                    |    |                     |    |
| Bacteriochlorophyll biosynthetic process                                   | GO:0030494 | BP      | 100       |                    |    |                     |    |
| Light-dependent bacteriochlorophyll biosynthetic process                   | GO:0036069 | BP      | 100       |                    |    |                     |    |
| Light-independent bacteriochlorophyll biosynthetic process                 | GO:0036070 | BP      | 100       |                    |    |                     |    |
| 2-desacetyl-2-hydroxyethyl bacteriochlorophyllide a dehydrogenase activity | GO:0036354 | MF      | 100       |                    |    |                     |    |
| Chlorosome                                                                 | GO:0046858 | CC      | 100       |                    |    |                     |    |
| B875 antenna complex                                                       | GO:0030080 | CC      | 100       |                    |    |                     |    |
| Light-harvesting complex, peripheral complex                               | GO:0030079 | CC      | 100       |                    |    |                     |    |
| light-harvesting complex                                                   | GO:0030076 | CC      | 72.73     |                    |    |                     |    |
| plasma membrane light-harvesting complex                                   | GO:0030077 | CC      | 26.68     |                    |    |                     |    |
| organelle inner membrane                                                   | GO:0019866 | CC      | 8.25      |                    |    |                     |    |
| chlorophyll binding                                                        | GO:0016168 | MF      | 0.08-5.21 |                    |    |                     |    |



|                                                                                                                      |            |    |             |                                                                                     |                                                    |
|----------------------------------------------------------------------------------------------------------------------|------------|----|-------------|-------------------------------------------------------------------------------------|----------------------------------------------------|
| electron transporter, transferring electrons within the cyclic electron transport pathway of photosynthesis activity | GO:0045156 | MF | 3.6         |                                                                                     |                                                    |
| photosynthesis, light reaction                                                                                       | GO:0019684 | BP | 2.16        |                                                                                     |                                                    |
| plasma membrane-derived chromatophore membrane                                                                       | GO:0042717 | CC | 2.08        |                                                                                     |                                                    |
| protein-chromophore linkage                                                                                          | GO:0018298 | BP | 0.03-1.94   |                                                                                     |                                                    |
| chlorosome envelope                                                                                                  | GO:0033105 | BP | 1.39-76.47  |                                                                                     |                                                    |
| response to herbicide                                                                                                | GO:0009635 | BP | 0.16        |                                                                                     |                                                    |
| photosynthetic electron transport in photosystem II                                                                  | GO:0009772 | BP | 0.11        |                                                                                     |                                                    |
| plasma membrane                                                                                                      | GO:0005886 | CC | 0.05        |                                                                                     | TRINITY_PA_BC71_c0_g1_i1                           |
| photosynthesis                                                                                                       | GO:0015979 | BP | 0.01-1.14   |                                                                                     |                                                    |
| metal ion binding                                                                                                    | GO:0046872 | MF | 0.02-0.03   | TRINITY_MA_RF190_c0_g1_i1<br>TRINITY_MA_RF108_c0_g2_i1<br>TRINITY_MA_RF108_c0_g1_i1 | TRINITY_PA_BC71_c0_g1_i1                           |
| integral component of membrane                                                                                       | GO:0016021 | CC | 0.01        |                                                                                     |                                                    |
| membrane                                                                                                             | GO:0016020 | CC | 0.01        |                                                                                     | TRINITY_PA_RF133_c0_g1_i1 TRINITY_PA_BC71_c0_g1_i1 |
| oxidoreductase activity, acting on iron-sulfur proteins as donors                                                    | GO:0016730 | MF | 18.00-22.57 |                                                                                     |                                                    |
| photosynthesis, dark reaction                                                                                        | GO:0019685 | BP | 22.27-24.15 |                                                                                     |                                                    |
| pigment biosynthetic process                                                                                         | GO:0046148 | BP | 15.57-21.63 |                                                                                     |                                                    |
| oxidoreductase activity, acting on the CH-CH group of donors, iron-sulfur protein as acceptor                        | GO:0016636 | MF | 14.67       |                                                                                     |                                                    |
| chlorophyll biosynthetic process                                                                                     | GO:0015995 | BP | 0.03-13.96  |                                                                                     |                                                    |
| oxidoreductase activity, acting on iron-sulfur proteins as donors, NAD or NADP as acceptor                           | GO:0016731 | MF | 0.11-7.21   |                                                                                     |                                                    |

|                                                                                       |            |    |            |
|---------------------------------------------------------------------------------------|------------|----|------------|
| magnesium chelatase activity                                                          | GO:0016851 | MF | 0.12-6.16  |
| magnesium-protoporphyrin IX monomethyl ester (oxidative) cyclase activity             | GO:0048529 | MF | 0.07-12.35 |
| oxidoreductase activity, acting on the CH-CH group of donors, NAD or NADP as acceptor | GO:0016628 | MF | 0.01-22.43 |
| carbonyl sulfide nitrogenase activity                                                 | GO:0018697 | MF | 0.82       |
| hydro-lyase activity                                                                  | GO:0016836 | MF | 0.01-0.65  |
| nitrogenase activity                                                                  | GO:0016163 | MF | 0.57       |
| protochlorophyllide reductase activity                                                | GO:0016630 | MF | 0.55       |
| 4 iron, 4 sulfur cluster binding                                                      | GO:0051539 | BP | 0.19-0.25  |
| porphyrin-containing compound biosynthetic process                                    | GO:0006779 | BP | 0.22       |
| iron-sulfur cluster binding                                                           | GO:0051536 | MF | 0.11-0.15  |
| oxidoreductase activity                                                               | GO:0016491 | MF | 0.01-0.04  |
| divinyl chlorophyllide a 8-vinyl-reductase activity                                   | GO:0033728 | MF | 0.04       |
| D-xylulose reductase activity                                                         | GO:0046526 | MF | 0.04-0.25  |
| L-threonine 3-dehydrogenase activity                                                  | GO:0008743 | MF | 0.04-0.06  |

TRINITY\_PA\_RF202\_c0\_g1\_i1  
TRINITY\_PA\_RF164\_c0\_g1\_i  
TRINITY\_PA\_RF77\_c0\_g1\_i1  
TRINITY\_PA\_RF164\_c1\_g1\_i1  
TRINITY\_PA\_RF226\_c0\_g1\_i1  
TRINITY\_PA\_RF34\_c0\_g1\_i1

|                                                                                                                                                                      |            |    |           |                                                                                                                                                                        |                         |                                                                                                                                                                          |                          |
|----------------------------------------------------------------------------------------------------------------------------------------------------------------------|------------|----|-----------|------------------------------------------------------------------------------------------------------------------------------------------------------------------------|-------------------------|--------------------------------------------------------------------------------------------------------------------------------------------------------------------------|--------------------------|
| oxidation-reduction process                                                                                                                                          | GO:0055114 | BP | 0.02-0.04 |                                                                                                                                                                        |                         | TRINITY_PA_RF164_c0_g1_i1<br>TRINITY_PA_RF202_c0_g1_i1<br>TRINITY_PA_RF77_c0_g1_i1<br>TRINITY_PA_RF164_c1_g1_i1<br>TRINITY_PA_RF226_c0_g1_i1<br>TRINITY_PA_RF34_c0_g1_i1 | TRINITY_PA_BC71_c0_g1_i1 |
| magnesium protoporphyrin IX methyltransferase activity                                                                                                               | GO:0046406 | MF | 0.03      |                                                                                                                                                                        |                         |                                                                                                                                                                          |                          |
| ligase activity                                                                                                                                                      | GO:0016874 | MF | 0.03      |                                                                                                                                                                        |                         |                                                                                                                                                                          |                          |
| nucleotide binding                                                                                                                                                   | GO:0000166 | MF | 0.02-0.03 | TRINITY_MA_RF53_c0_g1_i1<br>TRINITY_MA_RF81_c0_g1_i1<br>TRINITY_MA_RF150_c1_g1_i1<br>TRINITY_MA_RF150_c0_g1_i1<br>TRINITY_MA_RF139_c0_g1_i1<br>TRINITY_MA_RF3_c0_g1_i1 | TRINITY_MA_BC9_c0_g1_i1 | TRINITY_PA_RF207_c0_g1_i1<br>TRINITY_PA_RF133_c0_g1_i1<br>TRINITY_PA_RF201_c0_g1_i1<br>TRINITY_PA_RF35_c0_g1_i1<br>TRINITY_PA_RF77_c0_g1_i1<br>TRINITY_PA_RF226_c0_g1_i1 | TRINITY_PA_BC69_c0_g1_i1 |
| geranylgeranyl reductase activity                                                                                                                                    | GO:0045550 | MF | 0.03-0.06 |                                                                                                                                                                        |                         |                                                                                                                                                                          |                          |
| ATP binding                                                                                                                                                          | GO:0005524 | MF | 0.02-0.03 | TRINITY_MA_RF53_c0_g1_i1<br>TRINITY_MA_RF150_c1_g1_i1<br>TRINITY_MA_RF150_c0_g1_i1                                                                                     | TRINITY_MA_BC9_c0_g1_i1 |                                                                                                                                                                          |                          |
| coproporphyrinogen dehydrogenase activity                                                                                                                            | GO:0051989 | MF | 0.02      |                                                                                                                                                                        |                         |                                                                                                                                                                          |                          |
| oxidoreductase activity, acting on paired donors, with incorporation or reduction of molecular oxygen, NAD(P)H as one donor, and incorporation of one atom of oxygen | GO:0016709 | MF | 0.02      |                                                                                                                                                                        |                         |                                                                                                                                                                          |                          |
| iron ion binding                                                                                                                                                     | GO:0005506 | MF | 0.02      |                                                                                                                                                                        |                         |                                                                                                                                                                          |                          |
| zinc ion binding                                                                                                                                                     | GO:0008270 | MF | 0.02      |                                                                                                                                                                        |                         |                                                                                                                                                                          |                          |
| coproporphyrinogen oxidase activity                                                                                                                                  | GO:0004109 | MF | 0.01      |                                                                                                                                                                        |                         |                                                                                                                                                                          |                          |
| sigma factor activity                                                                                                                                                | GO:0016987 | MF | 0.01      |                                                                                                                                                                        |                         |                                                                                                                                                                          |                          |

|                                         |            |    |      |                          |
|-----------------------------------------|------------|----|------|--------------------------|
| DNA-templated transcription, initiation | GO:0006352 | BP | 0.01 | TRINITY_PA_BC71_c0_g1_i1 |
| cobalamin binding                       | GO:0031419 | MF | 0.01 |                          |
| prenyltransferase activity              | GO:0004659 | MF | 0.01 |                          |

---

\*GO term ontology: CC = Cellular component, MF = Molecular Function, BP = Biological Process
